# Supplementary material for: Perylene bisimide cyclophanes as receptors for planar transition structures – catalysis of stereoinversions by shape-complementarity and noncovalent π–π interactions
Source: Royal Society of Chemistry journal article supplement (doi:10.1039/d1qo00755f), 2021-01-01
Supplement: d1qo00755f1.pdf [file d1qo00755f1.pdf]

# Supporting Information

## Perylene bisimide cyclophanes as receptors for planar transition structures – Catalysis of stereoinversions by shape-complementarity and noncovalent $\pi$ - $\pi$ interactions

Asja A. Kroeger, Amir Karton

School of Molecular Sciences, The University of Western Australia, 35 Stirling Highway,  
Crawley, WA 6009, Australia

### Table of contents

|                                                                                                                                                                                                        | <b>page</b> |
|--------------------------------------------------------------------------------------------------------------------------------------------------------------------------------------------------------|-------------|
| 1. Catalysis of the sumanene bowl inversion with a di-core-substituted PBI cyclophane                                                                                                                  | 2           |
| 2. Stereoinversion paths obtained from intrinsic reaction coordinate calculations                                                                                                                      | 3           |
| 3. Reaction barrier heights and reductions, as well as supramolecular interaction energies given in kcal mol <sup>-1</sup>                                                                             | 5           |
| 4. Comparison of reaction barrier heights and reductions, as well as supramolecular interaction energies resulting from calculations including solvation corrections for chloroform and toluene        | 5           |
| 5. Comparison of reaction barrier heights and reductions, as well as supramolecular interaction energies obtained from calculations using the def2-QZVP' and the def2-TZVPP basis set                  | 6           |
| 6. 3D representations of overlaid host and guest geometries from free and complex optimizations, as well as energy differences between respective pairs for both equilibrium and transition structures | 7           |
| 7. Cartesian coordinates, computed absolute Gibbs free energies and number of imaginary frequencies for all optimized structures                                                                       | 10          |

# 1. Catalysis of the sumanene bowl inversion with a di-core-substituted PBI cyclophane

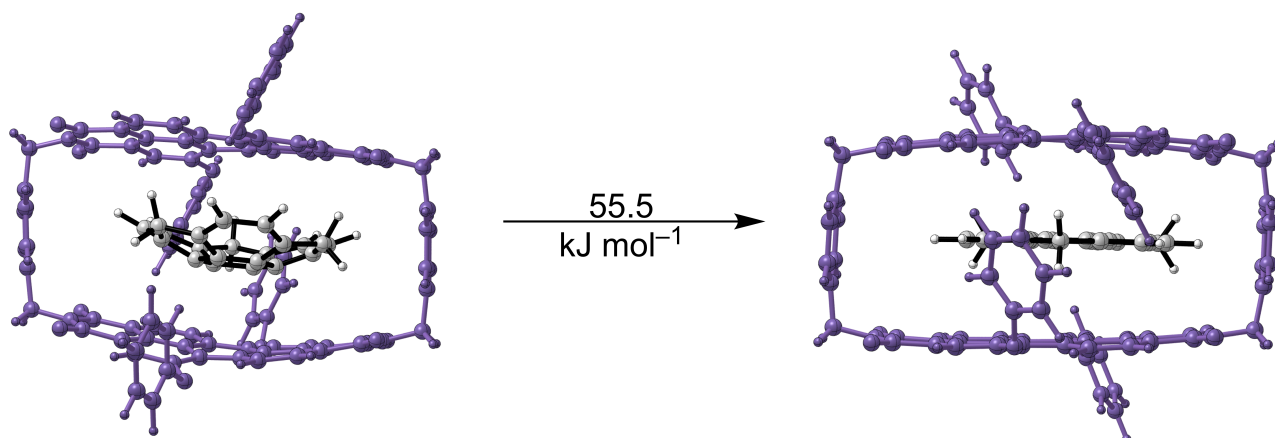

| Compound | $\Delta G_{\text{uncat}}^{\ddagger}$ | $\Delta G_{\text{cat}}^{\ddagger}$ | $\Delta\Delta G_{\text{cat}}^{\ddagger}$ | $\Delta G_{\text{complex}}$ | % reduction |
|----------|--------------------------------------|------------------------------------|------------------------------------------|-----------------------------|-------------|
| 4        | 82.8                                 | 55.5                               | 27.3                                     | -38.9                       | 33.0        |

**Figure S1.** 3D representations of lowest energy equilibrium and transition structure host-guest complexes between sumanene and the di-core-substituted PBI cyclophane along with reaction barrier heights at 298 K for the uncatalyzed ( $\Delta G_{\text{uncat}}^{\ddagger}$ ) and catalyzed ( $\Delta G_{\text{cat}}^{\ddagger}$ ) inversion, catalytic enhancement ( $\Delta\Delta G_{\text{cat}}^{\ddagger}$ ) from complexation and complexation energy between reactant and cyclophane ( $\Delta G_{\text{complex}}$ ) in  $\text{kJ mol}^{-1}$ , as well as resulting percentage barrier reduction (% reduction) obtained at the SMD(chloroform)-PW6B95-D3(BJ)/Def2-QZVP' level of theory.

## 2. Stereoinversion paths obtained from intrinsic reaction coordinate calculations

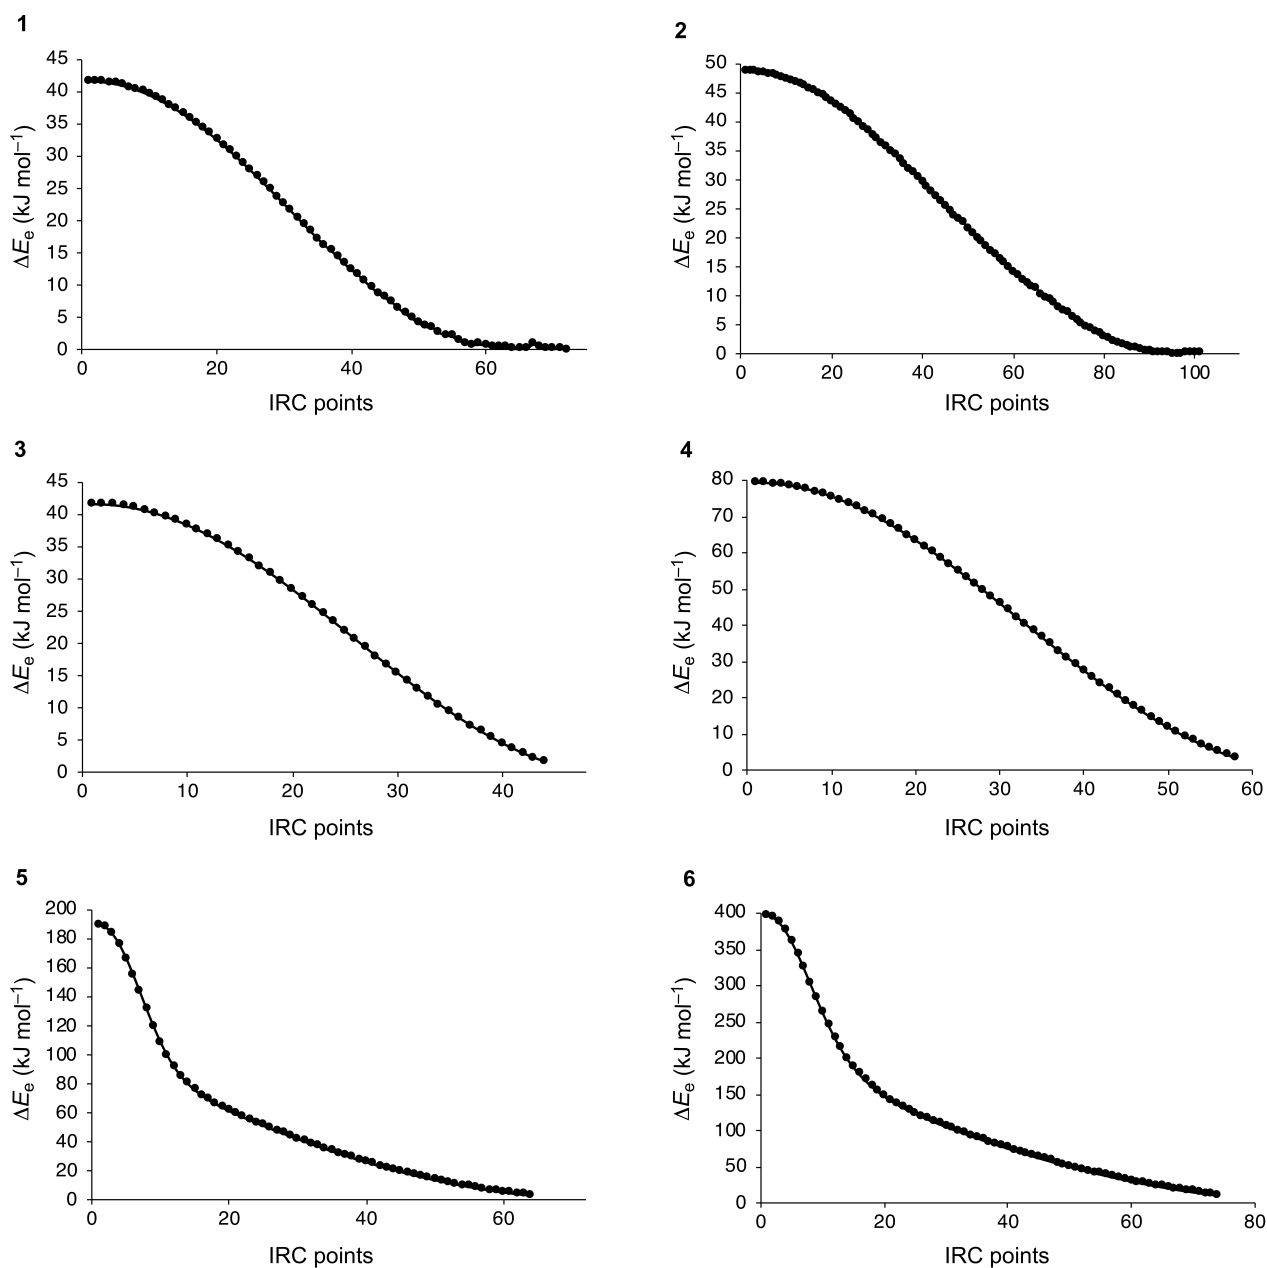

**Figure S2.** Intrinsic reaction coordinates (IRCs) for the free stereoinversions of 1–6, obtained at the PBE-D3(BJ)/6-31G(d) level of theory. Electronic energies ( $\Delta E_e$ ) are given relative to the energies of the most stable optimized reactant complex obtained at the same level of theory.

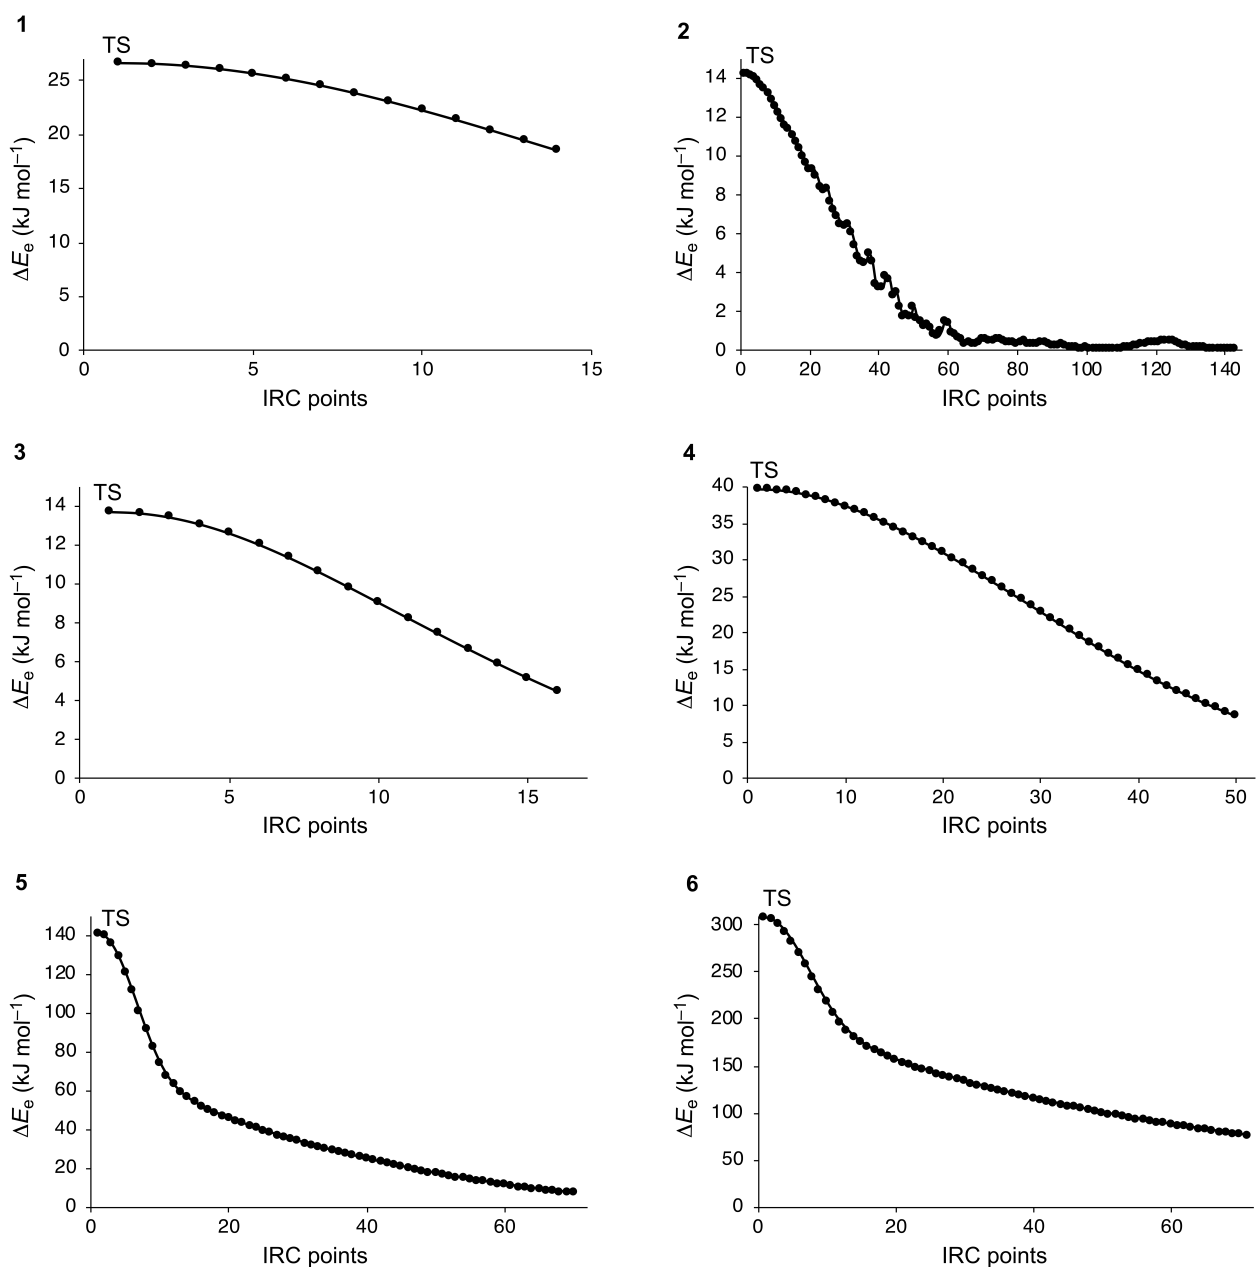

**Figure S3.** Intrinsic reaction coordinates (IRCs) for the PBI cyclophane catalyzed stereoinversions of **1–6**, obtained at the PBE-D3(BJ)/6-31G(d) level of theory. Electronic energies ( $\Delta E_e$ ) are given relative to the energies of the most stable optimized reactant complex obtained at the same level of theory.

### 3. Reaction barrier heights and reductions, as well as supramolecular interaction energies given in kcal mol<sup>-1</sup>

**Table S1.** Reaction barrier heights at 298 K for the uncatalyzed ( $\Delta G^\ddagger_{\text{uncat}}$ ) and catalyzed ( $\Delta G^\ddagger_{\text{cat}}$ ) inversions of compounds **1–6**, catalytic enhancements ( $\Delta\Delta G^\ddagger_{\text{cat}}$ ), as well as supramolecular interaction energies ( $\Delta G_{\text{complex}}$ ) in kcal mol<sup>-1</sup>.

| Compound | $\Delta G^\ddagger_{\text{uncat}}$ | $\Delta G^\ddagger_{\text{cat}}$ | $\Delta\Delta G^\ddagger_{\text{cat}}$ | $\Delta G_{\text{complex}}$ |
|----------|------------------------------------|----------------------------------|----------------------------------------|-----------------------------|
| <b>1</b> | 12.9                               | 9.0                              | 3.9                                    | 0.0                         |
| <b>2</b> | 10.7                               | 1.9                              | 8.9                                    | -3.1                        |
| <b>3</b> | 11.3                               | 4.1                              | 7.2                                    | -13.1                       |
| <b>4</b> | 19.8                               | 13.0                             | 6.7                                    | -11.3                       |
| <b>5</b> | 44.4                               | 33.4                             | 11.0                                   | -16.3                       |
| <b>6</b> | 93.1                               | 77.8                             | 15.3                                   | -9.9                        |

### 4. Comparison of reaction barrier heights and reductions, as well as supramolecular interaction energies resulting from calculations including solvation corrections for chloroform and toluene

**Table S2.** Reaction barrier heights at 298 K for the uncatalyzed ( $\Delta G^\ddagger_{\text{uncat}}$ ) and catalyzed ( $\Delta G^\ddagger_{\text{cat}}$ ) inversions of compounds **1–6**, catalytic enhancements ( $\Delta\Delta G^\ddagger_{\text{cat}}$ ), as well as supramolecular interaction energies ( $\Delta G_{\text{complex}}$ ) in kJ mol<sup>-1</sup> obtained from calculations using solvation corrections for chloroform and toluene (in brackets).

| Compound | $\Delta G^\ddagger_{\text{uncat}}$ | $\Delta G^\ddagger_{\text{cat}}$ | $\Delta\Delta G^\ddagger_{\text{cat}}$ | $\Delta G_{\text{complex}}$ |
|----------|------------------------------------|----------------------------------|----------------------------------------|-----------------------------|
| <b>1</b> | 53.9 (54.2)                        | 37.6 (37.3)                      | 16.3 (15.9)                            | 0.0 (-0.3)                  |
| <b>2</b> | 45.0 (45.2)                        | 7.9 (N/A*)                       | 37.1 (N/A*)                            | -12.8 (-14.5)               |
| <b>3</b> | 47.4 (47.0)                        | 17.1 (15.9)                      | 30.2 (31.1)                            | -54.7 (-56.2)               |
| <b>4</b> | 82.8 (83.0)                        | 54.6 (55.0)                      | 28.2 (28.0)                            | -47.1 (-47.0)               |
| <b>5</b> | 185.7 (186.1)                      | 139.7 (139.1)                    | 46.0 (47.0)                            | -68.3 (-70.4)               |
| <b>6</b> | 389.3 (389.5)                      | 325.3 (329.2)                    | 64.0 (60.2)                            | -41.3 (-42.2)               |

\* The solvation free energy of the transition structure complex with compound **2** for toluene could not be obtained due to numerical issues.

5. Comparison of reaction barrier heights and reductions, as well as supramolecular interaction energies obtained from calculations using the def2-QZVP' and the def2-TZVPP basis set

**Table S3.** Reaction barrier heights at 298 K for the uncatalyzed ( $\Delta G_{\text{uncat}}^{\ddagger}$ ) and catalyzed ( $\Delta G_{\text{cat}}^{\ddagger}$ ) inversions of compounds **1–6**, catalytic enhancements ( $\Delta\Delta G_{\text{cat}}^{\ddagger}$ ), as well as supramolecular interaction energies ( $\Delta G_{\text{complex}}$ ) in  $\text{kJ mol}^{-1}$  obtained from calculations at the SMD(chloroform)-PW6B95-D3(BJ)/def2-QZVP' and SMD(chloroform)-PW6B95-D3(BJ)/def2-TZVPP (in brackets) levels of theory.

| Compound | $\Delta G_{\text{uncat}}^{\ddagger}$ | $\Delta G_{\text{cat}}^{\ddagger}$ | $\Delta\Delta G_{\text{cat}}^{\ddagger}$ | $\Delta G_{\text{complex}}$ |
|----------|--------------------------------------|------------------------------------|------------------------------------------|-----------------------------|
| <b>1</b> | 53.9 (53.7)                          | 37.6 (37.8)                        | 16.3 (16.0)                              | 0.0 (0.0)                   |
| <b>2</b> | 45.0 (45.0)                          | 7.9 (9.7)                          | 37.1 (35.3)                              | -12.8 (-13.0)               |
| <b>3</b> | 47.4 (46.8)                          | 17.1 (18.8)                        | 30.2 (28.0)                              | -54.7 (-54.2)               |
| <b>4</b> | 82.8 (82.3)                          | 54.6 (57.5)                        | 28.2 (24.7)                              | -47.1 (-47.1)               |
| <b>5</b> | 185.7 (186.0)                        | 139.7 (142.1)                      | 46.0 (43.8)                              | -68.3 (-69.3)               |
| <b>6</b> | 389.3 (390.2)                        | 325.3 (325.9)                      | 64.0 (64.3)                              | -41.3 (-42.0)               |

**6. 3D representations of overlaid host and guest geometries from free and complex optimizations, as well as energy differences in kJ mol<sup>-1</sup> between respective pairs for both equilibrium and transition structures**

(Substrate geometries before complexation are represented in red, while substrate geometries after complexation are represented in blue. The PBI cyclophane catalyst geometry before complexation is represented in green, whereas catalyst geometries from host-guest complexes are represented in blue.)

**Equilibrium structures**

**Substrates**

1

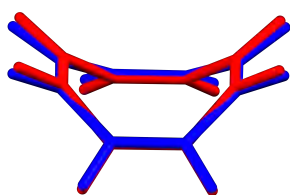

$$\Delta E_e = 5.1$$

2

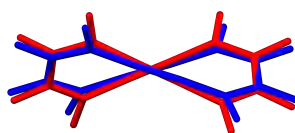

$$\Delta E_e = 10.6$$

3

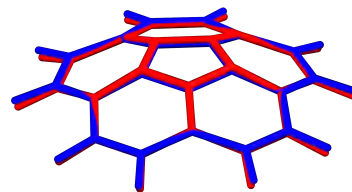

$$\Delta E_e = 6.7$$

4

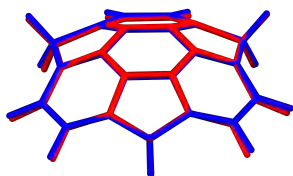

$$\Delta E_e = 5.7$$

5

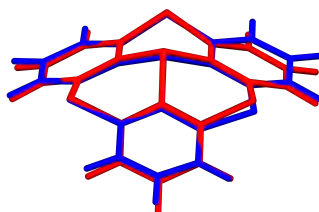

$$\Delta E_e = 12.1$$

6

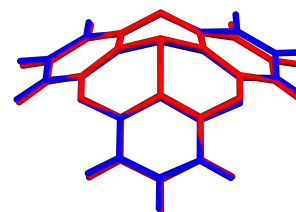

$$\Delta E_e = 10.0$$

**Cyclophanes**

1

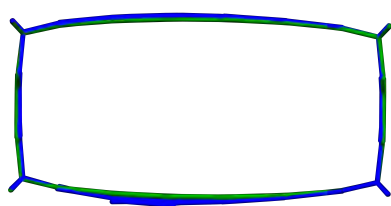

$$\Delta E_e = 1.6$$

2

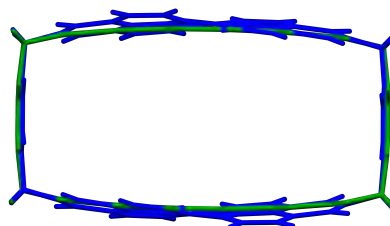

$$\Delta E_e = 5.2$$

3

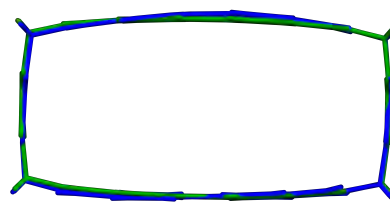

$$\Delta E_e = 1.1$$

4

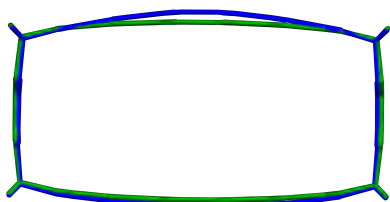

$$\Delta E_e = 2.5$$

5

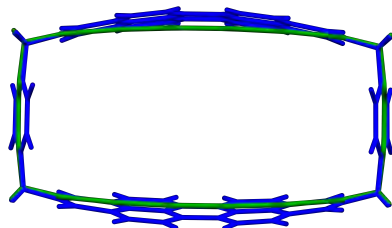

$$\Delta E_e = 2.5$$

6

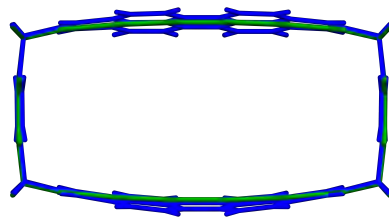

$$\Delta E_e = 1.1$$

## Transition structures

### Substrates

1

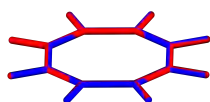

$$\Delta E_e = 0.9$$

2

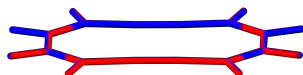

$$\Delta E_e = 1.1$$

3

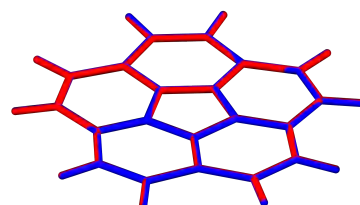

$$\Delta E_e = 2.6$$

4

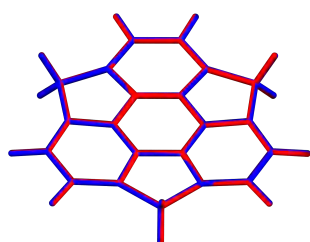

$$\Delta E_e = 1.9$$

5

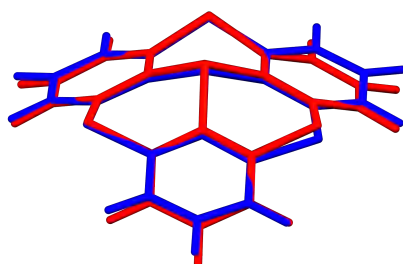

$$\Delta E_e = -1.1$$

6

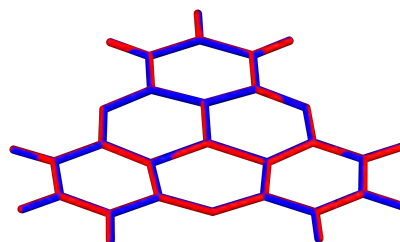

$$\Delta E_e = -2.8$$

### Cyclophanes

1

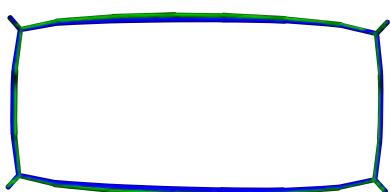

$$\Delta E_e = -0.2$$

2

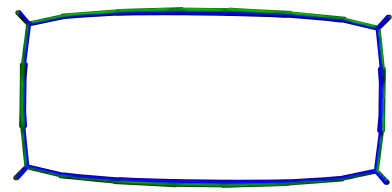

$$\Delta E_e = -1.9$$

3

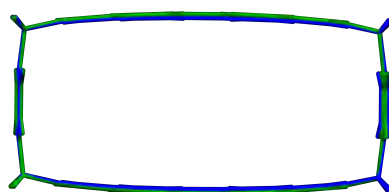

$$\Delta E_e = -1.9$$



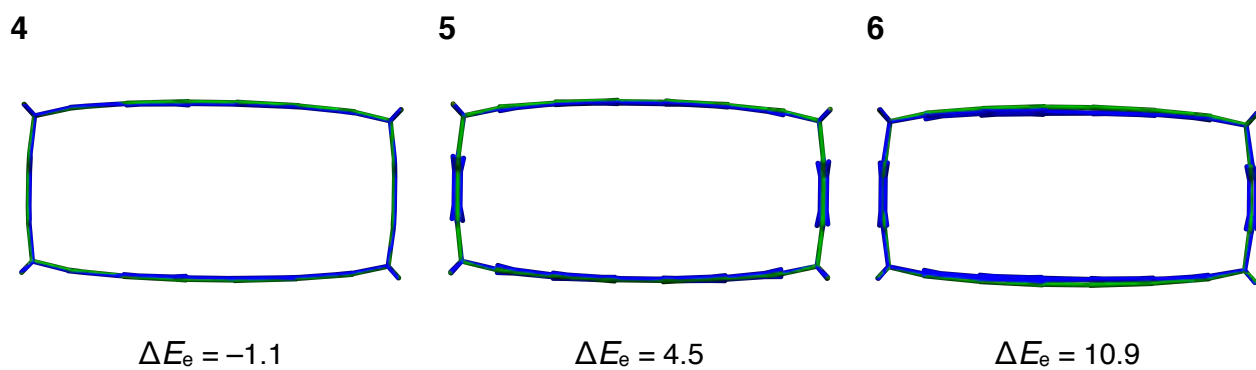

**Figure S4.** Overlays of 3D host and guest geometries from free optimizations and from complex optimizations. Differences in electronic energies ( $\Delta E_e$ , PW6B95-D3(BJ)/Def2-TZVPP) between substrates from free and host-guest complex optimizations, calculated as  $\Delta E_e = E_{e,\text{complex}} - E_{e,\text{free}}$ , are given in  $\text{kJ mol}^{-1}$ .

7. **Optimized structures (PBE-D3(BJ)/6-31G(d), Cartesian coordinates (in Å), computed absolute energies (SMD-(chloroform)-PW6B95-D3(BJ)/Def2-QZVP'//PBE-D3(BJ)/6-31G(d), in Hartree) and imaginary frequencies for transition structures**

**Free equilibrium structures**

**1**

|   |           |           |           |
|---|-----------|-----------|-----------|
| C | -0.675821 | 1.568634  | 0.378891  |
| H | -1.181996 | 2.368535  | 0.938987  |
| C | 0.675821  | 1.568634  | 0.378891  |
| H | 1.181996  | 2.368535  | 0.938987  |
| C | 1.568634  | 0.675821  | -0.378891 |
| H | 2.368535  | 1.181996  | -0.938987 |
| C | 1.568634  | -0.675821 | -0.378891 |
| H | 2.368535  | -1.181996 | -0.938987 |
| C | -1.568634 | 0.675821  | -0.378891 |
| H | -2.368535 | 1.181996  | -0.938987 |
| C | -1.568634 | -0.675821 | -0.378891 |
| H | -2.368535 | -1.181996 | -0.938987 |
| C | -0.675821 | -1.568634 | 0.378891  |
| C | 0.675821  | -1.568634 | 0.378891  |
| H | -1.181996 | -2.368535 | 0.938987  |
| H | 1.181996  | -2.368535 | 0.938987  |

Number of imaginary frequencies = 0

Computed total Gibbs free energy = -310.03868 a.u.

**2**

|   |           |           |           |
|---|-----------|-----------|-----------|
| C | 0.568926  | 1.378691  | 0.244833  |
| C | -0.568926 | 1.378691  | -0.244833 |
| C | 0.568926  | -1.378691 | -0.244833 |
| C | -0.568926 | -1.378691 | 0.244833  |
| C | -1.847142 | 1.377409  | -0.819835 |
| H | -2.044955 | 2.141475  | -1.584502 |
| C | -2.891780 | 0.554909  | -0.459355 |
| H | -3.865830 | 0.799191  | -0.901821 |
| C | -2.891780 | -0.554909 | 0.459355  |
| H | -3.865830 | -0.799191 | 0.901821  |
| C | -1.847142 | -1.377409 | 0.819835  |
| H | -2.044955 | -2.141475 | 1.584502  |
| C | 1.847142  | -1.377409 | -0.819835 |
| H | 2.044955  | -2.141475 | -1.584502 |
| C | 2.891780  | -0.554909 | -0.459355 |
| H | 3.865830  | -0.799191 | -0.901821 |
| C | 2.891780  | 0.554909  | 0.459355  |
| H | 3.865830  | 0.799191  | 0.901821  |
| C | 1.847142  | 1.377409  | 0.819835  |
| H | 2.044955  | 2.141475  | 1.584502  |

Number of imaginary frequencies = 0  
Computed total Gibbs free energy = -462.61718 a.u.

**3**

|   |           |           |           |
|---|-----------|-----------|-----------|
| C | 1.312055  | 2.994372  | -0.262767 |
| C | 2.442370  | 2.173150  | -0.262767 |
| C | -1.312055 | 2.994372  | -0.262767 |
| C | -0.000000 | 2.495473  | 0.097602  |
| C | -0.000000 | 1.210560  | 0.641712  |
| C | 2.373336  | 0.771144  | 0.097602  |
| C | -2.442370 | 2.173150  | -0.262767 |
| C | 3.253264  | -0.322527 | -0.262767 |
| C | 0.698573  | -3.193704 | -0.262767 |
| C | -0.698573 | -3.193704 | -0.262767 |
| C | 1.466802  | -2.018880 | 0.097602  |
| C | 0.711549  | -0.979364 | 0.641712  |
| C | -0.711549 | -0.979364 | 0.641712  |
| C | -1.466802 | -2.018880 | 0.097602  |
| C | -2.821522 | -1.651291 | -0.262767 |
| C | -3.253264 | -0.322527 | -0.262767 |
| C | -2.373336 | 0.771144  | 0.097602  |
| C | -1.151311 | 0.374084  | 0.641712  |
| C | 2.821522  | -1.651291 | -0.262767 |
| C | 1.151311  | 0.374084  | 0.641712  |
| H | -4.257598 | -0.100804 | -0.641340 |
| H | -3.503720 | -2.421001 | -0.641340 |
| H | -1.219800 | -4.080367 | -0.641340 |
| H | 1.219800  | -4.080367 | -0.641340 |
| H | 3.503720  | -2.421001 | -0.641340 |
| H | 4.257598  | -0.100804 | -0.641340 |
| H | 3.385218  | 2.584106  | -0.641340 |
| H | 1.411541  | 4.018066  | -0.641340 |
| H | -1.411541 | 4.018066  | -0.641340 |
| H | -3.385218 | 2.584106  | -0.641340 |

Number of imaginary frequencies = 0  
Computed total Gibbs free energy = -769.34369 a.u.

**4**

|   |           |           |           |
|---|-----------|-----------|-----------|
| C | -3.232425 | 1.037756  | 0.454098  |
| C | -2.514936 | 2.280484  | 0.454098  |
| C | -1.213935 | 2.371146  | -0.069751 |
| C | -2.660440 | -0.134274 | -0.069751 |
| C | -2.859167 | -1.650741 | 0.194143  |
| C | 3.232425  | 1.037756  | 0.454098  |
| C | 2.660440  | -0.134274 | -0.069751 |
| C | 2.859167  | -1.650741 | 0.194143  |
| C | 2.514936  | 2.280484  | 0.454098  |
| C | 1.213935  | 2.371146  | -0.069751 |
| C | 0.718597  | 1.220576  | -0.710672 |
| C | 1.416348  | 0.012035  | -0.710672 |
| C | 0.697751  | -1.232611 | -0.710672 |

|   |           |           |           |
|---|-----------|-----------|-----------|
| C | 1.446505  | -2.236872 | -0.069751 |
| C | 0.717489  | -3.318240 | 0.454098  |
| C | -0.717489 | -3.318240 | 0.454098  |
| C | -1.446505 | -2.236872 | -0.069751 |
| C | -0.697751 | -1.232611 | -0.710672 |
| C | -1.416348 | 0.012035  | -0.710672 |
| C | -0.718597 | 1.220576  | -0.710672 |
| C | 0.000000  | 3.301482  | 0.194143  |
| H | 2.960253  | 3.122008  | 0.996864  |
| H | 4.183865  | 1.002650  | 0.996864  |
| H | 0.000000  | 3.685476  | 1.228925  |
| H | -2.960253 | 3.122008  | 0.996864  |
| H | -4.183865 | 1.002650  | 0.996864  |
| H | -3.625784 | -2.093347 | -0.471608 |
| H | -1.223612 | -4.124658 | 0.996864  |
| H | 1.223612  | -4.124658 | 0.996864  |
| H | 3.191716  | -1.842738 | 1.228925  |
| H | -3.191716 | -1.842738 | 1.228925  |
| H | 0.000000  | 4.186695  | -0.471608 |
| H | 3.625784  | -2.093347 | -0.471608 |

Number of imaginary frequencies = 0

Computed total Gibbs free energy = -808.67271 a.u.

## 5

|   |           |           |           |
|---|-----------|-----------|-----------|
| P | -0.000030 | 0.000041  | 1.140919  |
| S | -1.672934 | 2.754952  | 0.444935  |
| S | -1.549325 | -2.826345 | 0.444857  |
| S | 3.222361  | 0.071357  | 0.445380  |
| C | -1.636700 | -0.036242 | 0.284387  |
| C | 0.786949  | 1.435425  | 0.284265  |
| C | 0.161728  | -2.596548 | -0.003688 |
| C | 0.849700  | -1.399190 | 0.284290  |
| C | 2.167947  | 1.438319  | -0.003279 |
| C | -2.276118 | -1.260286 | -0.003313 |
| C | -3.620520 | 1.132226  | -0.560156 |
| H | -4.129264 | 2.074880  | -0.781300 |
| C | 0.664987  | 3.734386  | -0.560705 |
| H | 0.063137  | 4.620425  | -0.782098 |
| C | 2.901829  | -2.443080 | -0.560173 |
| H | 3.970190  | -2.364946 | -0.781130 |
| C | -2.329717 | 1.158266  | -0.003359 |
| C | 0.046640  | 2.601188  | -0.003614 |
| C | 0.829679  | -3.701265 | -0.560750 |
| H | 0.267658  | -4.613103 | -0.782124 |
| C | 2.790779  | 2.569145  | -0.560294 |
| H | 3.861560  | 2.538420  | -0.781235 |
| C | 2.229494  | -1.340959 | -0.003218 |
| C | -4.239666 | -0.093898 | -0.824286 |
| H | -5.245334 | -0.116197 | -1.254811 |
| C | -3.566831 | -1.291383 | -0.560083 |
| H | -4.033371 | -2.255643 | -0.781160 |

|   |          |           |           |
|---|----------|-----------|-----------|
| C | 2.201145 | -3.624391 | -0.824771 |
| H | 2.723267 | -4.484092 | -1.255491 |
| C | 2.038495 | 3.718280  | -0.824848 |
| H | 2.522038 | 4.600242  | -1.255605 |

Number of imaginary frequencies = 0  
Computed total Gibbs free energy = -2229.743 a.u.

**6**

|   |           |           |           |
|---|-----------|-----------|-----------|
| P | -0.000086 | 0.000001  | 1.546851  |
| C | -1.519656 | -0.060210 | 0.547578  |
| C | 0.707697  | 1.346132  | 0.547732  |
| C | 0.079264  | -2.401499 | 0.119318  |
| C | 0.811985  | -1.285964 | 0.547783  |
| C | 2.040211  | 1.269343  | 0.119572  |
| C | -2.023233 | -1.296275 | 0.119340  |
| C | -3.338866 | 1.096815  | -0.567104 |
| H | -3.813547 | 2.029566  | -0.881701 |
| C | 0.445205  | 3.485805  | -0.567482 |
| H | -0.192883 | 4.315299  | -0.882283 |
| C | 2.796431  | -2.128375 | -0.567191 |
| H | 3.833917  | -1.990477 | -0.881718 |
| C | -2.119453 | 1.132170  | 0.119402  |
| C | -0.110961 | 2.400223  | 0.119287  |
| C | 0.719571  | -3.439669 | -0.567478 |
| H | 0.149101  | -4.317045 | -0.882263 |
| C | 2.619279  | 2.342899  | -0.567228 |
| H | 3.664426  | 2.287522  | -0.881750 |
| C | 2.134236  | -1.103978 | 0.119572  |
| C | -3.903785 | -0.154628 | -0.865853 |
| H | -4.858582 | -0.192440 | -1.398806 |
| C | -3.241609 | -1.357461 | -0.567205 |
| H | -3.641014 | -2.324836 | -0.881818 |
| C | 2.085823  | -3.303153 | -0.866193 |
| H | 2.595956  | -4.111014 | -1.399329 |
| C | 1.817973  | 3.457779  | -0.866226 |
| H | 2.262595  | 4.303450  | -1.399389 |
| O | -1.494286 | 2.366710  | 0.339070  |
| O | 2.796805  | 0.110803  | 0.339484  |
| O | -1.302438 | -2.477485 | 0.339014  |

Number of imaginary frequencies = 0  
Computed total Gibbs free energy = -1260.0827 a.u.

### **PBI cyclophane catalyst**

|   |           |           |           |
|---|-----------|-----------|-----------|
| C | -5.054488 | -3.328914 | 1.249444  |
| C | -3.577653 | -3.456762 | 1.226549  |
| C | -2.862475 | -3.489893 | 0.000011  |
| C | -3.577622 | -3.456211 | -1.226527 |
| C | -5.054442 | -3.328225 | -1.249379 |
| C | -2.881430 | -3.501491 | 2.432441  |
| C | -1.428459 | -3.543275 | 0.000006  |

|   |           |           |           |
|---|-----------|-----------|-----------|
| C | -0.729685 | -3.562643 | 1.253519  |
| C | -1.481457 | -3.556105 | 2.441528  |
| C | 0.737652  | -3.561873 | 1.253530  |
| C | 1.436419  | -3.542204 | 0.000023  |
| C | 0.737666  | -3.562064 | -1.253490 |
| C | -0.729672 | -3.562427 | -1.253502 |
| C | -1.481424 | -3.555324 | -2.441522 |
| C | -2.881389 | -3.500486 | -2.432429 |
| H | -3.453793 | -3.475376 | -3.363702 |
| H | -0.975715 | -3.577818 | -3.409264 |
| H | -3.453843 | -3.476880 | 3.363721  |
| H | -0.975757 | -3.578916 | 3.409267  |
| C | 1.489405  | -3.554152 | 2.441546  |
| C | 2.870398  | -3.487728 | 0.000030  |
| C | 1.489439  | -3.554917 | -2.441495 |
| C | 3.585533  | -3.453511 | 1.226552  |
| C | 2.889333  | -3.498295 | 2.432453  |
| H | 3.461704  | -3.472678 | 3.363730  |
| C | 3.585555  | -3.454113 | -1.226494 |
| C | 2.889378  | -3.499336 | -2.432394 |
| H | 3.461781  | -3.474258 | -3.363666 |
| C | 5.062245  | -3.324084 | 1.249414  |
| C | 5.062279  | -3.324957 | -1.249380 |
| H | 0.983761  | -3.577998 | -3.409238 |
| H | 0.983718  | -3.576883 | 3.409293  |
| O | -5.697395 | -3.269009 | 2.303262  |
| O | -5.697340 | -3.267681 | -2.303164 |
| O | 5.705023  | -3.263180 | 2.303240  |
| O | 5.705116  | -3.264905 | -2.303229 |
| N | -5.698779 | -3.251337 | 0.000046  |
| N | 5.706500  | -3.246048 | 0.000005  |
| C | -5.062299 | 3.324970  | 1.249307  |
| C | -3.585574 | 3.454125  | 1.226442  |
| C | -2.870398 | 3.487730  | -0.000070 |
| C | -3.585514 | 3.453497  | -1.226603 |
| C | -5.062226 | 3.324071  | -1.249486 |
| C | -2.889416 | 3.499354  | 2.432353  |
| C | -1.436419 | 3.542207  | -0.000042 |
| C | -0.737684 | 3.562078  | 1.253481  |
| C | -1.489477 | 3.554934  | 2.441475  |
| C | 0.729655  | 3.562444  | 1.253514  |
| C | 1.428459  | 3.543275  | 0.000015  |
| C | 0.729702  | 3.562632  | -1.253506 |
| C | -0.737634 | 3.561859  | -1.253539 |
| C | -1.489368 | 3.554119  | -2.441566 |
| C | -2.889296 | 3.498263  | -2.432494 |
| H | -3.461652 | 3.472633  | -3.363780 |
| H | -0.983664 | 3.576831  | -3.409305 |
| H | -3.461832 | 3.474280  | 3.363617  |
| H | -0.983815 | 3.578016  | 3.409226  |
| C | 1.481392  | 3.555365  | 2.441544  |
| C | 2.862475  | 3.489893  | 0.000030  |

|   |           |           |           |
|---|-----------|-----------|-----------|
| C | 1.481489  | 3.556089  | -2.441506 |
| C | 3.577606  | 3.456225  | 1.226578  |
| C | 2.881357  | 3.500523  | 2.432470  |
| H | 3.453749  | 3.475427  | 3.363751  |
| C | 3.577670  | 3.456753  | -1.226498 |
| C | 2.881463  | 3.501474  | -2.432400 |
| H | 3.453888  | 3.476859  | -3.363672 |
| C | 5.054425  | 3.328231  | 1.249451  |
| C | 5.054505  | 3.328904  | -1.249372 |
| H | 0.975802  | 3.578899  | -3.409252 |
| H | 0.975672  | 3.577882  | 3.409280  |
| O | -5.705151 | 3.264919  | 2.303147  |
| O | -5.704988 | 3.263169  | -2.303322 |
| O | 5.697308  | 3.267692  | 2.303246  |
| O | 5.697425  | 3.268982  | -2.303181 |
| N | -5.706500 | 3.246046  | -0.000086 |
| N | 5.698779  | 3.251339  | 0.000036  |
| C | -7.145810 | -2.923000 | 0.000075  |
| H | -7.572112 | -3.382820 | -0.901862 |
| H | -7.572066 | -3.382982 | 0.901956  |
| C | 7.152819  | -2.914704 | -0.000087 |
| H | 7.580026  | -3.373638 | -0.902041 |
| H | 7.580197  | -3.373649 | 0.901786  |
| C | 7.145810  | 2.922999  | 0.000024  |
| H | 7.572100  | 3.382791  | 0.901982  |
| H | 7.572080  | 3.383009  | -0.901836 |
| C | -7.152819 | 2.914703  | -0.000013 |
| H | -7.580039 | 3.373661  | 0.901922  |
| H | -7.580185 | 3.373622  | -0.901904 |
| C | -7.323493 | -1.417375 | 0.000173  |
| C | -7.347956 | -0.704041 | 1.212838  |
| C | -7.349500 | -0.704146 | -1.212515 |
| C | -7.349712 | 0.695393  | 1.212775  |
| H | -7.326072 | -1.255077 | 2.157908  |
| C | -7.351251 | 0.695296  | -1.212582 |
| H | -7.328828 | -1.255229 | -2.157588 |
| C | -7.327059 | 1.408681  | 0.000046  |
| H | -7.329334 | 1.246535  | 2.157824  |
| H | -7.332018 | 1.246337  | -2.157713 |
| C | 7.327060  | -1.408683 | -0.000098 |
| C | 7.349723  | -0.695352 | -1.212802 |
| C | 7.351241  | -0.695340 | 1.212556  |
| C | 7.347966  | 0.704082  | -1.212814 |
| H | 7.329353  | -1.246460 | -2.157870 |
| C | 7.349491  | 0.704102  | 1.212538  |
| H | 7.332001  | -1.246415 | 2.157667  |
| C | 7.323493  | 1.417374  | -0.000125 |
| H | 7.326088  | 1.255151  | -2.157866 |
| H | 7.328812  | 1.255152  | 2.157631  |

Number of imaginary frequencies = 0

Computed total Gibbs free energy = -3284.2371 a.u.

## Free transition structures

**1**

|   |           |           |           |
|---|-----------|-----------|-----------|
| C | -0.000079 | 0.737744  | 1.696220  |
| H | -0.000181 | 1.136817  | 2.718055  |
| C | 0.000079  | -0.737744 | 1.696220  |
| H | 0.000181  | -1.136817 | 2.718055  |
| C | 0.000079  | -1.696218 | 0.737744  |
| H | 0.000194  | -2.718054 | 1.136816  |
| C | 0.000079  | -1.696218 | -0.737744 |
| H | 0.000194  | -2.718054 | -1.136816 |
| C | -0.000079 | 1.696218  | 0.737744  |
| H | -0.000194 | 2.718054  | 1.136816  |
| C | -0.000079 | 1.696218  | -0.737744 |
| H | -0.000194 | 2.718054  | -1.136816 |
| C | -0.000079 | 0.737744  | -1.696220 |
| C | 0.000079  | -0.737744 | -1.696220 |
| H | -0.000181 | 1.136817  | -2.718055 |
| H | 0.000181  | -1.136817 | -2.718055 |

Number of imaginary frequencies = 1 (-151.3 cm<sup>-1</sup>)  
Computed total Gibbs free energy = -310.01815 a.u.

**2**

|   |           |           |           |
|---|-----------|-----------|-----------|
| C | 0.000000  | 1.567435  | 0.614921  |
| C | 0.000000  | 1.567435  | -0.614921 |
| C | -0.000000 | -1.567435 | 0.614921  |
| C | -0.000000 | -1.567435 | -0.614921 |
| C | 0.000000  | 1.685244  | -2.023284 |
| H | 0.000000  | 2.724270  | -2.383030 |
| C | 0.000000  | 0.730522  | -3.002740 |
| H | 0.000000  | 1.144775  | -4.018503 |
| C | -0.000000 | -0.730522 | -3.002740 |
| H | -0.000000 | -1.144775 | -4.018503 |
| C | -0.000000 | -1.685244 | -2.023284 |
| H | -0.000000 | -2.724270 | -2.383030 |
| C | -0.000000 | -1.685244 | 2.023284  |
| H | -0.000000 | -2.724270 | 2.383030  |
| C | -0.000000 | -0.730522 | 3.002740  |
| H | -0.000000 | -1.144775 | 4.018503  |
| C | -0.000000 | 0.730522  | 3.002740  |
| H | -0.000000 | 1.144775  | 4.018503  |
| C | -0.000000 | 1.685244  | 2.023284  |
| H | -0.000000 | 2.724270  | 2.383030  |

Number of imaginary frequencies = 1 (-97.3 cm<sup>-1</sup>)  
Computed total Gibbs free energy = -462.60005 a.u.

**3**

|   |          |          |           |
|---|----------|----------|-----------|
| C | 1.369389 | 3.086768 | 0.000000  |
| C | 2.512526 | 2.256230 | -0.000000 |



|   |           |           |           |
|---|-----------|-----------|-----------|
| C | -1.369389 | 3.086768  | -0.000000 |
| C | 0.000000  | 2.569965  | -0.000000 |
| C | 0.000000  | 1.193053  | -0.000000 |
| C | 2.444182  | 0.794163  | -0.000000 |
| C | -2.512526 | 2.256230  | 0.000000  |
| C | 3.358855  | -0.348503 | 0.000000  |
| C | 0.706498  | -3.302154 | 0.000000  |
| C | -0.706498 | -3.302154 | -0.000000 |
| C | 1.510587  | -2.079145 | -0.000000 |
| C | 0.701259  | -0.965200 | -0.000000 |
| C | -0.701259 | -0.965200 | -0.000000 |
| C | -1.510587 | -2.079145 | -0.000000 |
| C | -2.922216 | -1.692341 | 0.000000  |
| C | -3.358855 | -0.348503 | 0.000000  |
| C | -2.444182 | 0.794163  | -0.000000 |
| C | -1.134661 | 0.368674  | -0.000000 |
| C | 2.922216  | -1.692341 | 0.000000  |
| C | 1.134661  | 0.368674  | -0.000000 |
| H | -3.698377 | -2.465942 | 0.000000  |
| H | -4.441494 | -0.178862 | -0.000000 |
| H | -3.488112 | 2.755348  | 0.000000  |
| H | -1.542606 | 4.168840  | 0.000000  |
| H | 1.542606  | 4.168840  | 0.000000  |
| H | 3.488112  | 2.755348  | -0.000000 |
| H | 4.441494  | -0.178862 | 0.000000  |
| H | 3.698377  | -2.465942 | 0.000000  |
| H | 1.202389  | -4.279384 | 0.000000  |
| H | -1.202389 | -4.279384 | -0.000000 |

Number of imaginary frequencies = 1 (-110.8 cm<sup>-1</sup>)  
 Computed total Gibbs free energy = -769.32565 a.u.

**4**

|   |           |           |           |
|---|-----------|-----------|-----------|
| C | 2.684763  | -2.392675 | 0.000000  |
| C | 3.414499  | -1.128735 | -0.000000 |
| C | 2.763718  | 0.137593  | 0.000000  |
| C | 1.262700  | -2.462247 | 0.000000  |
| C | 0.000000  | -3.437831 | 0.000000  |
| C | -0.729736 | 3.521410  | 0.000000  |
| C | -1.501018 | 2.324653  | 0.000000  |
| C | -2.977249 | 1.718915  | 0.000000  |
| C | 0.729736  | 3.521410  | 0.000000  |
| C | 1.501018  | 2.324653  | 0.000000  |
| C | 0.686608  | 1.206106  | 0.000000  |
| C | -0.686608 | 1.206106  | -0.000000 |
| C | -1.387822 | -0.008433 | 0.000000  |
| C | -2.763718 | 0.137593  | -0.000000 |
| C | -3.414499 | -1.128735 | 0.000000  |
| C | -2.684763 | -2.392675 | -0.000000 |
| C | -1.262700 | -2.462247 | 0.000000  |
| C | -0.701214 | -1.197673 | 0.000000  |
| C | 0.701214  | -1.197673 | 0.000000  |

|   |           |           |           |
|---|-----------|-----------|-----------|
| C | 1.387822  | -0.008433 | -0.000000 |
| C | 2.977249  | 1.718915  | 0.000000  |
| H | 1.205096  | 4.508867  | 0.000000  |
| H | -1.205096 | 4.508867  | -0.000000 |
| H | 4.507341  | -1.210790 | -0.000000 |
| H | 3.302245  | -3.298077 | 0.000000  |
| H | -3.302245 | -3.298077 | 0.000000  |
| H | -4.507341 | -1.210790 | 0.000000  |
| H | -3.549987 | 2.049586  | 0.884770  |
| H | -3.549987 | 2.049586  | -0.884770 |
| H | 3.549987  | 2.049586  | -0.884770 |
| H | 3.549987  | 2.049586  | 0.884770  |
| H | -0.000000 | -4.099172 | -0.884770 |
| H | -0.000000 | -4.099172 | 0.884770  |

Number of imaginary frequencies = 1 (-121.3 cm<sup>-1</sup>)  
 Computed total Gibbs free energy = -808.64118 a.u.

**5**

|   |           |           |           |
|---|-----------|-----------|-----------|
| P | -0.000002 | -0.001799 | -0.001559 |
| C | -1.505147 | -0.866450 | -0.036819 |
| C | -2.718718 | -0.146770 | -0.114191 |
| C | -1.484984 | -2.277858 | 0.043162  |
| C | -3.926332 | -0.860832 | -0.117660 |
| C | -2.699580 | -2.975707 | -0.028208 |
| C | -3.908643 | -2.264758 | -0.098472 |
| H | -4.877957 | -0.321716 | -0.152181 |
| H | -2.702271 | -4.069510 | -0.000318 |
| H | -4.853736 | -2.813988 | -0.129675 |
| C | 0.000315  | 1.732947  | 0.023998  |
| C | -1.233986 | 2.419449  | 0.076280  |
| C | 1.234835  | 2.418989  | 0.076676  |
| C | -1.223271 | 3.808799  | 0.268208  |
| C | 1.224595  | 3.808350  | 0.268567  |
| C | 0.000776  | 4.489882  | 0.373931  |
| H | -2.167310 | 4.359827  | 0.317627  |
| H | 2.168831  | 4.359017  | 0.318272  |
| H | 0.000949  | 5.572918  | 0.524971  |
| C | 1.504825  | -0.867000 | -0.036961 |
| C | 2.718683  | -0.147764 | -0.114226 |
| C | 1.484067  | -2.278407 | 0.042855  |
| C | 3.925974  | -0.862372 | -0.118213 |
| C | 2.698356  | -2.976763 | -0.028856 |
| C | 3.907681  | -2.266310 | -0.099334 |
| H | 4.877841  | -0.323684 | -0.152802 |
| H | 2.700609  | -4.070570 | -0.001132 |
| H | 4.852533  | -2.815931 | -0.130921 |
| S | -2.830509 | 1.649950  | -0.287473 |
| S | 2.831335  | 1.648936  | -0.286286 |
| S | -0.000585 | -3.247256 | 0.395329  |

Number of imaginary frequencies = 1 (-347.3 cm<sup>-1</sup>)  
Computed total Gibbs free energy = -2229.6723 a.u.

**6**

|   |           |           |           |
|---|-----------|-----------|-----------|
| P | -0.000001 | -0.000028 | -0.000355 |
| C | 1.344716  | -0.962899 | -0.000301 |
| C | 1.070607  | -2.337765 | -0.000123 |
| C | 2.558033  | -0.260549 | -0.000065 |
| C | 2.214769  | -3.141893 | 0.000210  |
| C | 3.687852  | -1.084701 | 0.000275  |
| C | 3.482264  | -2.493487 | 0.000371  |
| H | 2.152485  | -4.233033 | 0.000353  |
| H | 4.700754  | -0.674211 | 0.000459  |
| H | 4.371191  | -3.130009 | 0.000600  |
| C | -1.506236 | -0.683061 | -0.000684 |
| C | -1.504674 | -2.085002 | -0.000226 |
| C | -2.559887 | 0.241716  | -0.000264 |
| C | -2.783304 | -2.651401 | 0.000379  |
| C | -3.828346 | -0.347094 | 0.000345  |
| C | -3.900578 | -1.768984 | 0.000570  |
| H | -2.934251 | -3.733847 | 0.000725  |
| H | -4.742146 | 0.252441  | 0.000671  |
| H | -4.896280 | -2.220566 | 0.000962  |
| C | 0.161533  | 1.645915  | -0.000447 |
| C | -1.053356 | 2.345585  | -0.000196 |
| C | 1.489249  | 2.096041  | -0.000097 |
| C | -0.904512 | 3.736096  | 0.000245  |
| C | 1.613590  | 3.488974  | 0.000351  |
| C | 0.418317  | 4.262462  | 0.000456  |
| H | -1.766445 | 4.408064  | 0.000436  |
| H | 2.589711  | 3.980556  | 0.000610  |
| H | 0.525064  | 5.350561  | 0.000744  |
| O | 2.605441  | 1.181606  | -0.000139 |
| O | -0.279435 | -2.847109 | -0.000194 |
| O | -2.326043 | 1.665597  | -0.000296 |

Number of imaginary frequencies = 1 (-437.5 cm<sup>-1</sup>)  
Computed total Gibbs free energy = -1259.9344 a.u.

### **Lowest energy equilibrium structure host-guest complexes between guests 1-6 and the PBI cyclophane catalyst**

**1**

|   |          |           |           |
|---|----------|-----------|-----------|
| C | 5.215092 | -3.398000 | -1.233484 |
| C | 3.740860 | -3.545666 | -1.209195 |
| C | 3.027662 | -3.596100 | 0.018006  |
| C | 3.743231 | -3.552166 | 1.244022  |
| C | 5.217614 | -3.398373 | 1.265692  |
| C | 3.043865 | -3.596652 | -2.414572 |
| C | 1.594863 | -3.674887 | 0.019110  |
| C | 0.894592 | -3.695395 | -1.233654 |

|   |           |           |           |
|---|-----------|-----------|-----------|
| C | 1.645078  | -3.672819 | -2.422626 |
| C | -0.571803 | -3.702883 | -1.231750 |
| C | -1.269638 | -3.706004 | 0.021566  |
| C | -0.570556 | -3.728726 | 1.273313  |
| C | 0.896710  | -3.712601 | 1.272710  |
| C | 1.649680  | -3.694903 | 2.460308  |
| C | 3.048460  | -3.612417 | 2.450202  |
| H | 3.620909  | -3.578784 | 3.381205  |
| H | 1.145257  | -3.730960 | 3.428315  |
| H | 3.615011  | -3.560163 | -3.346261 |
| H | 1.138513  | -3.699258 | -3.389713 |
| C | -1.321211 | -3.667511 | -2.419708 |
| C | -2.701105 | -3.641889 | 0.022774  |
| C | -1.319754 | -3.716866 | 2.462802  |
| C | -3.414060 | -3.574147 | -1.202768 |
| C | -2.719705 | -3.601428 | -2.409597 |
| H | -3.290892 | -3.540757 | -3.339812 |
| C | -3.414459 | -3.600658 | 1.249301  |
| C | -2.718511 | -3.650274 | 2.455294  |
| H | -3.289245 | -3.613228 | 3.387065  |
| C | -4.883154 | -3.392249 | -1.223881 |
| C | -4.886583 | -3.437656 | 1.274347  |
| H | -0.812703 | -3.736439 | 3.429894  |
| H | -0.815010 | -3.663725 | -3.387239 |
| O | 5.856646  | -3.329565 | -2.287791 |
| O | 5.860460  | -3.326359 | 2.318890  |
| O | -5.521310 | -3.266885 | -2.276231 |
| O | -5.530424 | -3.367064 | 2.327191  |
| N | 5.859534  | -3.313497 | 0.015523  |
| N | -5.529055 | -3.327815 | 0.024900  |
| C | 5.264016  | 3.332740  | -1.231803 |
| C | 3.793979  | 3.519926  | -1.196528 |
| C | 3.089688  | 3.569323  | 0.036005  |
| C | 3.811052  | 3.490238  | 1.256819  |
| C | 5.282556  | 3.314843  | 1.267406  |
| C | 3.090571  | 3.602111  | -2.396527 |
| C | 1.659556  | 3.681725  | 0.047691  |
| C | 0.953364  | 3.755691  | -1.199421 |
| C | 1.694307  | 3.719698  | -2.393963 |
| C | -0.511340 | 3.815104  | -1.187764 |
| C | -1.200935 | 3.741234  | 0.066917  |
| C | -0.495728 | 3.733587  | 1.315502  |
| C | 0.970030  | 3.698513  | 1.306042  |
| C | 1.727776  | 3.636580  | 2.488623  |
| C | 3.124855  | 3.536283  | 2.468568  |
| H | 3.702452  | 3.472985  | 3.394810  |
| H | 1.228089  | 3.646815  | 3.459767  |
| H | 3.653977  | 3.556231  | -3.332520 |
| H | 1.180717  | 3.763100  | -3.357048 |
| C | -1.271641 | 3.900852  | -2.366966 |
| C | -2.631851 | 3.665114  | 0.073592  |
| C | -1.240640 | 3.736976  | 2.508814  |

|   |           |           |           |
|---|-----------|-----------|-----------|
| C | -3.353524 | 3.655551  | -1.148120 |
| C | -2.669517 | 3.810577  | -2.352351 |
| H | -3.248141 | 3.829978  | -3.280122 |
| C | -3.336837 | 3.587360  | 1.302758  |
| C | -2.638350 | 3.660487  | 2.506641  |
| H | -3.205908 | 3.621338  | 3.440486  |
| C | -4.816893 | 3.429157  | -1.168258 |
| C | -4.800860 | 3.366312  | 1.329171  |
| H | -0.729224 | 3.774101  | 3.473299  |
| H | -0.773311 | 4.008471  | -3.333106 |
| O | 5.896581  | 3.252036  | -2.290696 |
| O | 5.931756  | 3.226887  | 2.315592  |
| O | -5.461427 | 3.343050  | -2.219654 |
| O | -5.429622 | 3.222135  | 2.384738  |
| N | 5.914777  | 3.227607  | 0.012495  |
| N | -5.448411 | 3.286504  | 0.083128  |
| C | 7.304108  | -2.976213 | 0.013151  |
| H | 7.733741  | -3.431076 | 0.916047  |
| H | 7.731995  | -3.436908 | -0.887670 |
| C | -6.962106 | -2.945662 | 0.028745  |
| H | -7.404933 | -3.398089 | 0.926362  |
| H | -7.406367 | -3.379367 | -0.877447 |
| C | -6.879652 | 2.902892  | 0.086196  |
| H | -7.324777 | 3.356258  | -0.810086 |
| H | -7.319250 | 3.340605  | 0.993017  |
| C | 7.352966  | 2.864500  | 0.000861  |
| H | 7.781596  | 3.312599  | -0.905893 |
| H | 7.797947  | 3.316613  | 0.897761  |
| C | 7.478039  | -1.470227 | 0.008427  |
| C | 7.495502  | -0.759348 | -1.205869 |
| C | 7.515424  | -0.754888 | 1.219423  |
| C | 7.506241  | 0.640036  | -1.208478 |
| H | 7.463561  | -1.312332 | -2.149492 |
| C | 7.527526  | 0.644510  | 1.216779  |
| H | 7.498311  | -1.304284 | 2.165614  |
| C | 7.501060  | 1.355747  | 0.002953  |
| H | 7.482379  | 1.189900  | -2.154274 |
| H | 7.520096  | 1.197828  | 2.160672  |
| C | -7.087677 | -1.434255 | 0.044212  |
| C | -7.095755 | -0.731682 | 1.264437  |
| C | -7.087133 | -0.706444 | -1.161006 |
| C | -7.066052 | 0.668283  | 1.278327  |
| H | -7.090527 | -1.292814 | 2.203896  |
| C | -7.055831 | 0.692777  | -1.145937 |
| H | -7.078103 | -1.248521 | -2.111347 |
| C | -7.028565 | 1.393955  | 0.073299  |
| H | -7.040666 | 1.210017  | 2.228605  |
| H | -7.020986 | 1.253904  | -2.084790 |
| C | -2.235689 | 0.483038  | -1.997503 |
| H | -2.584301 | 1.040510  | -2.878328 |
| C | -0.899976 | 0.449464  | -1.793108 |
| H | -0.274542 | 0.983259  | -2.523743 |

|   |           |           |           |
|---|-----------|-----------|-----------|
| C | -0.135769 | -0.284935 | -0.771836 |
| H | 0.760714  | -0.794231 | -1.153419 |
| C | -0.335520 | -0.328481 | 0.564582  |
| H | 0.416783  | -0.869120 | 1.156513  |
| C | -3.315711 | -0.177720 | -1.249994 |
| H | -4.111137 | -0.601130 | -1.878722 |
| C | -3.523511 | -0.218827 | 0.087305  |
| H | -4.473476 | -0.657687 | 0.418909  |
| C | -2.719892 | 0.356922  | 1.172733  |
| C | -1.379890 | 0.323610  | 1.369232  |
| H | -3.321146 | 0.808207  | 1.973906  |
| H | -1.014242 | 0.762090  | 2.308320  |

Number of imaginary frequencies = 0

Computed total Gibbs free energy = -3594.2758 a.u.

## 2

|   |           |           |           |
|---|-----------|-----------|-----------|
| C | 4.897608  | -3.336937 | -1.398855 |
| C | 3.433009  | -3.533008 | -1.314606 |
| C | 2.790751  | -3.698053 | -0.058987 |
| C | 3.565714  | -3.751058 | 1.129766  |
| C | 5.037305  | -3.591628 | 1.087500  |
| C | 2.671609  | -3.476509 | -2.480330 |
| C | 1.362540  | -3.769965 | 0.011394  |
| C | 0.601404  | -3.761229 | -1.202534 |
| C | 1.277211  | -3.602881 | -2.423516 |
| C | -0.855614 | -3.875679 | -1.125673 |
| C | -1.490372 | -3.740820 | 0.151823  |
| C | -0.730410 | -3.674946 | 1.364980  |
| C | 0.727054  | -3.806099 | 1.295868  |
| C | 1.531963  | -3.914346 | 2.443443  |
| C | 2.931636  | -3.895395 | 2.363730  |
| H | 3.552020  | -3.954828 | 3.262297  |
| H | 1.067793  | -4.000903 | 3.428826  |
| H | 3.188587  | -3.318881 | -3.430612 |
| H | 0.709529  | -3.534859 | -3.354354 |
| C | -1.659207 | -4.074623 | -2.261535 |
| C | -2.917239 | -3.645971 | 0.212754  |
| C | -1.409811 | -3.456724 | 2.575172  |
| C | -3.690122 | -3.767754 | -0.972591 |
| C | -3.058028 | -4.026325 | -2.188149 |
| H | -3.677987 | -4.146847 | -3.080918 |
| C | -3.560934 | -3.406943 | 1.455174  |
| C | -2.802700 | -3.310363 | 2.620572  |
| H | -3.321377 | -3.108913 | 3.561726  |
| C | -5.155746 | -3.559617 | -0.949010 |
| C | -5.023719 | -3.192023 | 1.523123  |
| H | -0.847019 | -3.361843 | 3.506694  |
| H | -1.192316 | -4.253509 | -3.233330 |
| O | 5.482608  | -3.134887 | -2.468753 |
| O | 5.739184  | -3.619186 | 2.104986  |
| O | -5.849549 | -3.604643 | -1.972090 |

|   |           |           |           |
|---|-----------|-----------|-----------|
| O | -5.612422 | -2.938571 | 2.579677  |
| N | 5.605827  | -3.362622 | -0.180737 |
| N | -5.725699 | -3.258427 | 0.302678  |
| C | 5.155749  | 3.559576  | -0.948819 |
| C | 3.690135  | 3.767706  | -0.972356 |
| C | 2.917288  | 3.645900  | 0.212997  |
| C | 3.560978  | 3.406636  | 1.455371  |
| C | 5.023817  | 3.192090  | 1.523338  |
| C | 3.058103  | 4.026519  | -2.187876 |
| C | 1.490422  | 3.740819  | 0.152056  |
| C | 0.855697  | 3.876092  | -1.125414 |
| C | 1.659303  | 4.075160  | -2.261252 |
| C | -0.601312 | 3.761704  | -1.202306 |
| C | -1.362471 | 3.769962  | 0.011597  |
| C | -0.727031 | 3.805787  | 1.296087  |
| C | 0.730423  | 3.674515  | 1.365163  |
| C | 1.409772  | 3.455654  | 2.575277  |
| C | 2.802672  | 3.309425  | 2.620678  |
| H | 3.321333  | 3.107632  | 3.561770  |
| H | 0.846873  | 3.360089  | 3.506668  |
| H | 3.678109  | 4.146944  | -3.080624 |
| H | 1.192399  | 4.254255  | -3.233012 |
| C | -1.277105 | 3.603793  | -2.423356 |
| C | -2.790685 | 3.698044  | -0.058861 |
| C | -1.531924 | 3.913944  | 2.443686  |
| C | -3.432925 | 3.533278  | -1.314529 |
| C | -2.671486 | 3.477290  | -2.480259 |
| H | -3.188428 | 3.319934  | -3.430610 |
| C | -3.565632 | 3.750806  | 1.129913  |
| C | -2.931594 | 3.894921  | 2.363918  |
| H | -3.552049 | 3.954353  | 3.262438  |
| C | -4.897502 | 3.336974  | -1.398838 |
| C | -5.037224 | 3.591470  | 1.087557  |
| H | -1.067700 | 4.000521  | 3.429043  |
| H | -0.709372 | 3.536129  | -3.354179 |
| O | 5.849479  | 3.604455  | -1.971959 |
| O | 5.612548  | 2.938716  | 2.579894  |
| O | -5.482457 | 3.134724  | -2.468726 |
| O | -5.739166 | 3.618665  | 2.105016  |
| N | 5.725820  | 3.258775  | 0.302912  |
| N | -5.605738 | 3.362889  | -0.180771 |
| C | 7.038109  | -2.987008 | -0.224259 |
| H | 7.526526  | -3.514491 | 0.606362  |
| H | 7.429116  | -3.344312 | -1.186587 |
| C | -7.145731 | -2.836782 | 0.320583  |
| H | -7.567087 | -3.174880 | 1.277040  |
| H | -7.634663 | -3.353670 | -0.516371 |
| C | -7.038068 | 2.987491  | -0.224243 |
| H | -7.429097 | 3.344828  | -1.186551 |
| H | -7.526357 | 3.515069  | 0.606391  |
| C | 7.145882  | 2.837182  | 0.320700  |
| H | 7.634686  | 3.354161  | -0.516268 |

|   |           |           |           |
|---|-----------|-----------|-----------|
| H | 7.567328  | 3.175217  | 1.277143  |
| C | 7.180966  | -1.483755 | -0.089473 |
| C | 7.157125  | -0.658693 | -1.229688 |
| C | 7.251696  | -0.887982 | 1.183591  |
| C | 7.186425  | 0.734645  | -1.098045 |
| H | 7.092933  | -1.118787 | -2.220338 |
| C | 7.276028  | 0.505593  | 1.315117  |
| H | 7.262143  | -1.526617 | 2.072164  |
| C | 7.234926  | 1.330656  | 0.176737  |
| H | 7.152894  | 1.374063  | -1.985825 |
| H | 7.300228  | 0.965671  | 2.307369  |
| C | -7.234807 | -1.330243 | 0.176770  |
| C | -7.275479 | -0.505207 | 1.315160  |
| C | -7.186830 | -0.734173 | -1.098014 |
| C | -7.251237 | 0.888397  | 1.183663  |
| H | -7.299238 | -0.965279 | 2.307427  |
| C | -7.157706 | 0.659157  | -1.229643 |
| H | -7.153640 | -1.373557 | -1.985835 |
| C | -7.181073 | 1.484237  | -0.089387 |
| H | -7.261184 | 1.526973  | 2.072281  |
| H | -7.093902 | 1.119232  | -2.220330 |
| C | 0.599847  | -0.155097 | 1.007434  |
| C | -0.599041 | 0.154167  | 1.007721  |
| C | 0.587086  | 0.193441  | -1.861234 |
| C | -0.588684 | -0.193960 | -1.861126 |
| C | -1.940981 | 0.564685  | 1.071781  |
| H | -2.206916 | 1.175705  | 1.945228  |
| C | -2.964329 | 0.264186  | 0.203650  |
| H | -3.963410 | 0.583860  | 0.527677  |
| C | -2.944511 | -0.433392 | -1.059241 |
| H | -3.926028 | -0.794554 | -1.390794 |
| C | -1.904797 | -0.680204 | -1.925416 |
| H | -2.140348 | -1.296592 | -2.803422 |
| C | 1.903157  | 0.679666  | -1.926602 |
| H | 2.138001  | 1.296039  | -2.804829 |
| C | 2.943552  | 0.433026  | -1.061210 |
| H | 3.924733  | 0.794393  | -1.393550 |
| C | 2.964600  | -0.264266 | 0.201868  |
| H | 3.964055  | -0.583520 | 0.525173  |
| C | 1.941974  | -0.565073 | 1.070776  |
| H | 2.208747  | -1.175872 | 1.944140  |

Number of imaginary frequencies = 0

Computed total Gibbs free energy = -3746.8592 a.u.

**3**

|   |          |           |           |
|---|----------|-----------|-----------|
| C | 4.778601 | -3.511839 | -1.337950 |
| C | 3.300407 | -3.573570 | -1.332000 |
| C | 2.572225 | -3.566902 | -0.114171 |
| C | 3.271916 | -3.539944 | 1.120511  |
| C | 4.746353 | -3.433012 | 1.159445  |
| C | 2.617642 | -3.587073 | -2.546585 |



|   |           |           |           |
|---|-----------|-----------|-----------|
| C | 1.139437  | -3.565719 | -0.130687 |
| C | 0.455359  | -3.549269 | -1.390462 |
| C | 1.218085  | -3.571114 | -2.571450 |
| C | -1.008180 | -3.499337 | -1.406047 |
| C | -1.721509 | -3.529546 | -0.162352 |
| C | -1.037947 | -3.587069 | 1.097086  |
| C | 0.426424  | -3.574406 | 1.114502  |
| C | 1.161195  | -3.568525 | 2.311459  |
| C | 2.560770  | -3.544112 | 2.318091  |
| H | 3.121301  | -3.510636 | 3.255645  |
| H | 0.642632  | -3.553154 | 3.271885  |
| H | 3.201798  | -3.593143 | -3.470901 |
| H | 0.720940  | -3.574355 | -3.543535 |
| C | -1.742957 | -3.412768 | -2.601840 |
| C | -3.154159 | -3.483166 | -0.177238 |
| C | -1.800718 | -3.644460 | 2.275999  |
| C | -3.852916 | -3.382226 | -1.408642 |
| C | -3.141778 | -3.351311 | -2.606873 |
| H | -3.703086 | -3.263691 | -3.541269 |
| C | -3.881905 | -3.509592 | 1.041467  |
| C | -3.199668 | -3.605920 | 2.252629  |
| H | -3.783563 | -3.627163 | 3.176924  |
| C | -5.324649 | -3.227043 | -1.440768 |
| C | -5.354642 | -3.363790 | 1.055673  |
| H | -1.304073 | -3.701962 | 3.246232  |
| H | -1.222731 | -3.376487 | -3.561123 |
| O | 5.438279  | -3.488997 | -2.384098 |
| O | 5.377315  | -3.314818 | 2.217503  |
| O | -5.955392 | -3.088217 | -2.495053 |
| O | -6.010054 | -3.343554 | 2.104165  |
| N | 5.412067  | -3.446700 | -0.081317 |
| N | -5.981197 | -3.201827 | -0.195071 |
| C | 5.102392  | 3.151110  | -1.435594 |
| C | 3.646975  | 3.418408  | -1.391376 |
| C | 2.961064  | 3.536029  | -0.153600 |
| C | 3.688722  | 3.450199  | 1.061963  |
| C | 5.144796  | 3.187974  | 1.064026  |
| C | 2.935926  | 3.501459  | -2.586377 |
| C | 1.536053  | 3.696327  | -0.131864 |
| C | 0.818238  | 3.736832  | -1.373372 |
| C | 1.544919  | 3.663155  | -2.573775 |
| C | -0.647077 | 3.771442  | -1.348502 |
| C | -1.323651 | 3.740206  | -0.083788 |
| C | -0.604435 | 3.761629  | 1.157310  |
| C | 0.860842  | 3.752722  | 1.132340  |
| C | 1.628945  | 3.712414  | 2.309445  |
| C | 3.019288  | 3.559639  | 2.279395  |
| H | 3.601924  | 3.488576  | 3.201512  |
| H | 1.139134  | 3.759512  | 3.283940  |
| H | 3.487221  | 3.408200  | -3.525944 |
| H | 1.022938  | 3.691633  | -3.532300 |
| C | -1.416457 | 3.759396  | -2.524212 |

|   |           |           |           |
|---|-----------|-----------|-----------|
| C | -2.753524 | 3.637840  | -0.059619 |
| C | -1.332140 | 3.712324  | 2.359146  |
| C | -3.486889 | 3.591928  | -1.274887 |
| C | -2.813686 | 3.670463  | -2.491975 |
| H | -3.401546 | 3.638761  | -3.413353 |
| C | -3.442865 | 3.554278  | 1.178690  |
| C | -2.727233 | 3.603400  | 2.373604  |
| H | -3.280424 | 3.532775  | 3.313888  |
| C | -4.958015 | 3.428437  | -1.274365 |
| C | -4.911738 | 3.375617  | 1.225034  |
| H | -0.808139 | 3.716838  | 3.316816  |
| H | -0.926218 | 3.792715  | -3.499296 |
| O | 5.719764  | 3.001510  | -2.496742 |
| O | 5.799729  | 3.072456  | 2.106581  |
| O | -5.621518 | 3.367978  | -2.316139 |
| O | -5.535101 | 3.261631  | 2.287012  |
| N | 5.761057  | 3.052555  | -0.195088 |
| N | -5.578635 | 3.329283  | -0.014383 |
| C | 6.872993  | -3.193466 | -0.070318 |
| H | 7.265412  | -3.649076 | 0.848933  |
| H | 7.284795  | -3.698904 | -0.954531 |
| C | -7.404806 | -2.787522 | -0.190974 |
| H | -7.865661 | -3.250691 | 0.691867  |
| H | -7.855188 | -3.183349 | -1.111127 |
| C | -7.030765 | 3.038303  | 0.004825  |
| H | -7.462788 | 3.540618  | -0.871634 |
| H | -7.425094 | 3.479082  | 0.930715  |
| C | 7.181733  | 2.634169  | -0.210315 |
| H | 7.619637  | 3.043111  | -1.131119 |
| H | 7.653233  | 3.087284  | 0.672412  |
| C | 7.130536  | -1.700542 | -0.107922 |
| C | 7.151024  | -1.015742 | -1.338152 |
| C | 7.229517  | -0.962340 | 1.086408  |
| C | 7.219167  | 0.381471  | -1.370882 |
| H | 7.075031  | -1.587168 | -2.267915 |
| C | 7.299550  | 0.435928  | 1.052736  |
| H | 7.209051  | -1.491084 | 2.044054  |
| C | 7.271735  | 1.121880  | -0.175344 |
| H | 7.194768  | 0.913345  | -2.326681 |
| H | 7.334021  | 1.009647  | 1.983615  |
| C | -7.470824 | -1.274147 | -0.136461 |
| C | -7.399206 | -0.605060 | 1.100323  |
| C | -7.474522 | -0.518586 | -1.323279 |
| C | -7.297661 | 0.789949  | 1.146785  |
| H | -7.393782 | -1.190225 | 2.024961  |
| C | -7.375130 | 0.876635  | -1.276174 |
| H | -7.521450 | -1.035976 | -2.286155 |
| C | -7.268355 | 1.542648  | -0.041834 |
| H | -7.210750 | 1.306352  | 2.107582  |
| H | -7.345087 | 1.459913  | -2.201289 |
| C | -2.956332 | -0.106517 | 0.290470  |
| C | -2.581987 | -0.070590 | -1.060858 |

|   |           |           |           |
|---|-----------|-----------|-----------|
| C | -2.008251 | -0.242447 | 2.775979  |
| C | -2.001000 | 0.108943  | 1.366137  |
| C | -0.760888 | 0.552011  | 0.921527  |
| C | -1.212564 | 0.181579  | -1.482873 |
| C | -0.835055 | -0.294849 | 3.545199  |
| C | -0.488384 | -0.092314 | -2.713210 |
| C | 3.148571  | -0.161929 | -1.315038 |
| C | 3.645147  | -0.193257 | -0.003521 |
| C | 1.754839  | 0.130530  | -1.614595 |
| C | 1.034549  | 0.562887  | -0.507381 |
| C | 1.532664  | 0.522653  | 0.817830  |
| C | 2.797461  | 0.055333  | 1.151693  |
| C | 2.930745  | -0.282799 | 2.558371  |
| C | 1.830672  | -0.308761 | 3.429433  |
| C | 0.478287  | 0.006892  | 2.995174  |
| C | 0.423080  | 0.509108  | 1.700821  |
| C | 0.914959  | -0.118446 | -2.774628 |
| C | -0.382755 | 0.585742  | -0.444041 |
| H | 3.901280  | -0.621936 | 2.937616  |
| H | 1.999691  | -0.658339 | 4.454659  |
| H | -0.918474 | -0.643389 | 4.581432  |
| H | -2.946974 | -0.555406 | 3.246078  |
| H | -3.993512 | -0.369367 | 0.529127  |
| H | -3.345297 | -0.314412 | -1.807443 |
| H | -1.047201 | -0.364468 | -3.615783 |
| H | 1.381333  | -0.410438 | -3.722319 |
| H | 3.836494  | -0.434878 | -2.122918 |
| H | 4.691703  | -0.478937 | 0.141816  |

Number of imaginary frequencies = 0

Computed total Gibbs free energy = -4053.6017 a.u.

**4**

|   |           |           |           |
|---|-----------|-----------|-----------|
| C | 5.010187  | -3.352817 | -1.261364 |
| C | 3.554775  | -3.622423 | -1.237887 |
| C | 2.849127  | -3.733277 | -0.011146 |
| C | 3.556792  | -3.630639 | 1.215139  |
| C | 5.011972  | -3.359782 | 1.238057  |
| C | 2.864387  | -3.724478 | -2.443764 |
| C | 1.425020  | -3.902781 | -0.010525 |
| C | 0.726994  | -3.949184 | -1.262737 |
| C | 1.473978  | -3.890372 | -2.452007 |
| C | -0.739175 | -3.953035 | -1.261624 |
| C | -1.435449 | -3.916377 | -0.008237 |
| C | -0.737150 | -3.960077 | 1.243768  |
| C | 0.729053  | -3.957717 | 1.242467  |
| C | 1.478105  | -3.907879 | 2.430846  |
| C | 2.868498  | -3.741767 | 2.421424  |
| H | 3.437464  | -3.668188 | 3.352333  |
| H | 0.973740  | -3.960699 | 3.397888  |
| H | 3.431830  | -3.644432 | -3.375066 |
| H | 0.968015  | -3.936037 | -3.418608 |

|   |           |           |           |
|---|-----------|-----------|-----------|
| C | -1.486960 | -3.892304 | -2.450269 |
| C | -2.860893 | -3.757843 | -0.006724 |
| C | -1.483007 | -3.904600 | 2.433939  |
| C | -3.568637 | -3.652241 | -1.233444 |
| C | -2.877992 | -3.739560 | -2.440610 |
| H | -3.444972 | -3.652463 | -3.371172 |
| C | -3.566446 | -3.656129 | 1.221574  |
| C | -2.873787 | -3.749342 | 2.427204  |
| H | -3.438980 | -3.664719 | 3.359080  |
| C | -5.025164 | -3.391275 | -1.255899 |
| C | -5.022463 | -3.391853 | 1.247302  |
| H | -0.975767 | -3.934562 | 3.400183  |
| H | -0.981192 | -3.917091 | -3.417419 |
| O | 5.645287  | -3.220090 | -2.314102 |
| O | 5.648438  | -3.232170 | 2.290589  |
| O | -5.665720 | -3.269680 | -2.306425 |
| O | -5.660486 | -3.268580 | 2.299131  |
| N | 5.648194  | -3.238745 | -0.011777 |
| N | -5.657277 | -3.256197 | -0.003632 |
| C | 5.079952  | 3.478064  | -1.244186 |
| C | 3.609102  | 3.644864  | -1.221357 |
| C | 2.894534  | 3.677995  | 0.004530  |
| C | 3.606982  | 3.629573  | 1.231127  |
| C | 5.077845  | 3.463809  | 1.254526  |
| C | 2.915981  | 3.708413  | -2.428106 |
| C | 1.462883  | 3.740032  | 0.003672  |
| C | 0.765802  | 3.776156  | -1.249594 |
| C | 1.517022  | 3.777646  | -2.437867 |
| C | -0.699004 | 3.797125  | -1.250823 |
| C | -1.397657 | 3.770720  | 0.001544  |
| C | -0.700965 | 3.778645  | 1.255344  |
| C | 0.763741  | 3.758467  | 1.256173  |
| C | 1.512853  | 3.744971  | 2.445606  |
| C | 2.911833  | 3.677408  | 2.437394  |
| H | 3.484407  | 3.642022  | 3.368419  |
| H | 1.004882  | 3.770555  | 3.412031  |
| H | 3.490093  | 3.684139  | -3.358534 |
| H | 1.010866  | 3.816442  | -3.404851 |
| C | -1.447494 | 3.825546  | -2.439316 |
| C | -2.830055 | 3.730789  | 0.000171  |
| C | -1.451127 | 3.789630  | 2.442955  |
| C | -3.542874 | 3.707001  | -1.227813 |
| C | -2.846476 | 3.776302  | -2.432267 |
| H | -3.418017 | 3.764073  | -3.364320 |
| C | -3.544913 | 3.693869  | 1.226757  |
| C | -2.850248 | 3.744529  | 2.433063  |
| H | -3.423375 | 3.721671  | 3.363922  |
| C | -5.012414 | 3.531526  | -1.253496 |
| C | -5.015285 | 3.525126  | 1.248231  |
| H | -0.945539 | 3.805587  | 3.410330  |
| H | -0.940441 | 3.858463  | -3.405527 |
| O | 5.721644  | 3.393048  | -2.297711 |

|   |           |           |           |
|---|-----------|-----------|-----------|
| O | 5.717872  | 3.367640  | 2.308094  |
| O | -5.652082 | 3.440922  | -2.307790 |
| O | -5.658283 | 3.433499  | 2.300315  |
| N | 5.721156  | 3.380378  | 0.005229  |
| N | -5.653531 | 3.422723  | -0.003713 |
| C | 7.076762  | -2.849729 | -0.011691 |
| H | 7.521853  | -3.295333 | 0.888592  |
| H | 7.520578  | -3.290458 | -0.915005 |
| C | -7.076022 | -2.833504 | -0.002199 |
| H | -7.530889 | -3.263680 | 0.900543  |
| H | -7.532931 | -3.265035 | -0.903303 |
| C | -7.079683 | 3.019258  | -0.005864 |
| H | -7.528590 | 3.455000  | -0.908735 |
| H | -7.532011 | 3.456296  | 0.894675  |
| C | 7.153169  | 2.996108  | 0.004552  |
| H | 7.597964  | 3.440695  | -0.896014 |
| H | 7.597789  | 3.435464  | 0.907790  |
| C | 7.218116  | -1.340953 | -0.007673 |
| C | 7.243232  | -0.624949 | -1.218331 |
| C | 7.249112  | -0.631886 | 1.206874  |
| C | 7.269659  | 0.774515  | -1.214898 |
| H | 7.211705  | -1.174840 | -2.163716 |
| C | 7.275652  | 0.767619  | 1.211321  |
| H | 7.222106  | -1.187068 | 2.149322  |
| C | 7.270341  | 1.484946  | 0.000290  |
| H | 7.262004  | 1.329174  | -2.158164 |
| H | 7.272282  | 1.316947  | 2.157672  |
| C | -7.174663 | -1.320690 | -0.003265 |
| C | -7.188281 | -0.606160 | 1.209292  |
| C | -7.178057 | -0.607531 | -1.216778 |
| C | -7.193084 | 0.793634  | 1.208340  |
| H | -7.172533 | -1.158205 | 2.153968  |
| C | -7.182704 | 0.792151  | -1.217527 |
| H | -7.154486 | -1.160932 | -2.160429 |
| C | -7.184025 | 1.506673  | -0.004976 |
| H | -7.182094 | 1.346163  | 2.152782  |
| H | -7.164094 | 1.343561  | -2.162545 |
| C | -2.377962 | 0.390886  | -2.522538 |
| C | -1.129484 | 0.389204  | -3.241422 |
| C | 0.060782  | -0.099304 | -2.662005 |
| C | -2.466600 | -0.086261 | -1.199591 |
| C | -3.405322 | 0.134056  | 0.025009  |
| C | 3.338148  | 0.202923  | 0.722348  |
| C | 2.200070  | -0.189101 | 1.459599  |
| C | 1.617351  | 0.070477  | 2.883147  |
| C | 3.333100  | 0.209449  | -0.717530 |
| C | 2.190120  | -0.176153 | -1.450605 |
| C | 1.147355  | -0.720431 | -0.689699 |
| C | 1.152124  | -0.726394 | 0.700915  |
| C | -0.084527 | -0.701213 | 1.419201  |
| C | 0.079248  | -0.123286 | 2.686263  |
| C | -1.107106 | 0.359405  | 3.278467  |

|   |           |           |           |
|---|-----------|-----------|-----------|
| C | -2.360516 | 0.367324  | 2.568103  |
| C | -2.458261 | -0.097178 | 1.241250  |
| C | -1.292877 | -0.687189 | 0.729649  |
| C | -1.297835 | -0.681176 | -0.701400 |
| C | -0.094208 | -0.689008 | -1.399323 |
| C | 1.597548  | 0.096539  | -2.867659 |
| H | 4.218680  | 0.616922  | -1.216901 |
| H | 4.227102  | 0.605897  | 1.219357  |
| H | 1.839204  | 1.115483  | -3.213952 |
| H | -1.117073 | 0.885236  | -4.219145 |
| H | -3.232641 | 0.886510  | -2.995655 |
| H | -4.260114 | -0.569945 | 0.024576  |
| H | -3.212174 | 0.857665  | 3.052021  |
| H | -1.088249 | 0.845621  | 4.261034  |
| H | 1.861537  | 1.086111  | 3.237456  |
| H | -3.850973 | 1.140330  | 0.031049  |
| H | 2.005139  | -0.602080 | -3.623940 |
| H | 2.030024  | -0.635220 | 3.630037  |

Number of imaginary frequencies = 0

Computed total Gibbs free energy = -4092.9278 a.u.

## 5

|   |           |          |           |
|---|-----------|----------|-----------|
| C | 5.002063  | 3.434104 | 1.460383  |
| C | 3.550434  | 3.718464 | 1.428531  |
| C | 2.845054  | 3.797832 | 0.198419  |
| C | 3.551039  | 3.656081 | -1.025790 |
| C | 5.000533  | 3.356366 | -1.040548 |
| C | 2.861238  | 3.860905 | 2.631326  |
| C | 1.422562  | 3.979276 | 0.193920  |
| C | 0.724100  | 4.054857 | 1.445199  |
| C | 1.471538  | 4.029688 | 2.635509  |
| C | -0.742094 | 4.057198 | 1.443227  |
| C | -1.437073 | 3.977465 | 0.190282  |
| C | -0.738587 | 4.016627 | -1.062326 |
| C | 0.727289  | 4.020145 | -1.060475 |
| C | 1.477641  | 3.948971 | -2.247601 |
| C | 2.865234  | 3.757778 | -2.234176 |
| H | 3.431583  | 3.652547 | -3.163162 |
| H | 0.974218  | 3.991705 | -3.214974 |
| H | 3.427717  | 3.802260 | 3.564505  |
| H | 0.966011  | 4.099002 | 3.600927  |
| C | -1.493225 | 4.040768 | 2.631427  |
| C | -2.859337 | 3.794514 | 0.191658  |
| C | -1.485331 | 3.937979 | -2.251225 |
| C | -3.568369 | 3.721766 | 1.420047  |
| C | -2.883012 | 3.872644 | 2.624051  |
| H | -3.452502 | 3.820917 | 3.555812  |
| C | -3.561404 | 3.645320 | -1.033900 |
| C | -2.872356 | 3.742450 | -2.240781 |
| H | -3.435735 | 3.630479 | -3.170772 |
| C | -5.020008 | 3.436993 | 1.449145  |

|   |           |           |           |
|---|-----------|-----------|-----------|
| C | -5.009910 | 3.341012  | -1.051164 |
| H | -0.979080 | 3.977169  | -3.217204 |
| H | -0.990750 | 4.117601  | 3.597907  |
| O | 5.637402  | 3.326521  | 2.516261  |
| O | 5.636631  | 3.179548  | -2.085945 |
| O | -5.658733 | 3.336229  | 2.503650  |
| O | -5.641963 | 3.153380  | -2.097152 |
| N | 5.635668  | 3.263926  | 0.213162  |
| N | -5.649001 | 3.256361  | 0.200989  |
| C | 5.046971  | -3.698209 | 1.015839  |
| C | 3.582487  | -3.903944 | 0.948181  |
| C | 2.868295  | -3.686564 | -0.259740 |
| C | 3.578358  | -3.375641 | -1.448568 |
| C | 5.046448  | -3.206601 | -1.437058 |
| C | 2.890650  | -4.265735 | 2.102775  |
| C | 1.436906  | -3.765540 | -0.275095 |
| C | 0.741186  | -4.100320 | 0.933203  |
| C | 1.494761  | -4.375859 | 2.087759  |
| C | -0.724459 | -4.102066 | 0.934477  |
| C | -1.422993 | -3.768116 | -0.272364 |
| C | -0.726158 | -3.495473 | -1.496615 |
| C | 0.737250  | -3.494951 | -1.498194 |
| C | 1.484318  | -3.215239 | -2.655235 |
| C | 2.882084  | -3.163897 | -2.636226 |
| H | 3.452477  | -2.926133 | -3.537437 |
| H | 0.975831  | -3.007530 | -3.598740 |
| H | 3.463151  | -4.438588 | 3.018298  |
| H | 0.990312  | -4.647922 | 3.016695  |
| C | -1.475438 | -4.380272 | 2.090080  |
| C | -2.854516 | -3.691622 | -0.254207 |
| C | -1.475867 | -3.214853 | -2.651717 |
| C | -3.566089 | -3.910470 | 0.955043  |
| C | -2.871512 | -4.272426 | 2.107877  |
| H | -3.441889 | -4.446851 | 3.024430  |
| C | -3.567327 | -3.381534 | -1.441541 |
| C | -2.873703 | -3.166598 | -2.630137 |
| H | -3.446395 | -2.928148 | -3.529676 |
| C | -5.030680 | -3.706012 | 1.025773  |
| C | -5.035983 | -3.217670 | -1.427771 |
| H | -0.969519 | -3.003755 | -3.595605 |
| H | -0.968900 | -4.652569 | 3.017802  |
| O | 5.685163  | -3.794908 | 2.070735  |
| O | 5.694016  | -2.913550 | -2.449631 |
| O | -5.666477 | -3.802303 | 2.082137  |
| O | -5.686646 | -2.929939 | -2.439838 |
| N | 5.687290  | -3.352731 | -0.191747 |
| N | -5.673890 | -3.362613 | -0.180814 |
| C | 7.060113  | 2.863265  | 0.219998  |
| H | 7.531654  | 3.343141  | -0.648802 |
| H | 7.484761  | 3.260899  | 1.152319  |
| C | -7.071969 | 2.850348  | 0.205752  |
| H | -7.542989 | 3.323687  | -0.666906 |

|   |           |           |           |
|---|-----------|-----------|-----------|
| H | -7.500791 | 3.251285  | 1.134758  |
| C | -7.105352 | -2.988637 | -0.115755 |
| H | -7.514309 | -3.495911 | 0.768826  |
| H | -7.582954 | -3.368955 | -1.029329 |
| C | 7.117696  | -2.973920 | -0.128422 |
| H | 7.530585  | -3.483389 | 0.753068  |
| H | 7.594454  | -3.348701 | -1.044704 |
| C | 7.195763  | 1.355520  | 0.149512  |
| C | 6.995570  | 0.568800  | 1.300927  |
| C | 7.449825  | 0.717629  | -1.076648 |
| C | 7.017714  | -0.828217 | 1.218047  |
| H | 6.799412  | 1.062951  | 2.257643  |
| C | 7.476031  | -0.680580 | -1.159349 |
| H | 7.588834  | 1.325926  | -1.975389 |
| C | 7.243050  | -1.467308 | -0.017397 |
| H | 6.834542  | -1.437160 | 2.109148  |
| H | 7.636130  | -1.173083 | -2.122861 |
| C | -7.201257 | 1.341677  | 0.142614  |
| C | -7.456278 | 0.696932  | -1.079686 |
| C | -6.993709 | 0.561212  | 1.297013  |
| C | -7.476408 | -0.701761 | -1.155770 |
| H | -7.600853 | 1.300231  | -1.980920 |
| C | -7.009729 | -0.836258 | 1.220765  |
| H | -6.796778 | 1.060785  | 2.250747  |
| C | -7.236355 | -1.482102 | -0.010968 |
| H | -7.637283 | -1.199468 | -2.116450 |
| H | -6.821008 | -1.440015 | 2.114288  |
| P | -0.000986 | 0.913889  | 0.244868  |
| S | -2.796499 | -0.031427 | 1.681697  |
| S | 2.796026  | -0.029458 | 1.684168  |
| S | 0.000740  | 0.856102  | -3.118366 |
| C | -0.000266 | -0.265582 | 1.638202  |
| C | -1.432912 | 0.342220  | -0.744554 |
| C | 2.650453  | 0.043083  | -0.092074 |
| C | 1.433121  | 0.345021  | -0.743046 |
| C | -1.429130 | 0.406117  | -2.153416 |
| C | 1.215933  | -0.642967 | 2.244547  |
| C | -1.217132 | -1.403989 | 3.426796  |
| H | -2.168504 | -1.695208 | 3.880988  |
| C | -3.845286 | -0.112349 | -0.819768 |
| H | -4.780557 | -0.324469 | -0.295094 |
| C | 2.624060  | 0.243767  | -2.881578 |
| H | 2.601473  | 0.302954  | -3.974317 |
| C | -1.216649 | -0.644537 | 2.243373  |
| C | -2.650307 | 0.038673  | -0.094531 |
| C | 3.846375  | -0.104777 | -0.816431 |
| H | 4.781903  | -0.314368 | -0.291211 |
| C | -2.621939 | 0.238980  | -2.883881 |
| H | -2.598738 | 0.298688  | -3.976589 |
| C | 1.430532  | 0.408979  | -2.151976 |
| C | -0.000690 | -1.768567 | 4.017150  |
| H | -0.000792 | -2.347530 | 4.946219  |



|   |           |           |           |
|---|-----------|-----------|-----------|
| C | 1.215867  | -1.401942 | 3.428398  |
| H | 2.167038  | -1.691442 | 3.884015  |
| C | 3.830769  | 0.026308  | -2.208683 |
| H | 4.763989  | -0.084754 | -2.766362 |
| C | -3.828767 | 0.018814  | -2.212021 |
| H | -4.761314 | -0.093155 | -2.770682 |

Number of imaginary frequencies = 0

Computed total Gibbs free energy = -5514.0061 a.u.

## 6

|   |           |           |           |
|---|-----------|-----------|-----------|
| C | 5.055636  | -2.983486 | -2.173272 |
| C | 3.577777  | -3.052626 | -2.168029 |
| C | 2.863993  | -3.379363 | -0.985823 |
| C | 3.577741  | -3.664145 | 0.208076  |
| C | 5.049805  | -3.517468 | 0.268285  |
| C | 2.882606  | -2.742792 | -3.335156 |
| C | 1.430816  | -3.390559 | -0.990278 |
| C | 0.732682  | -3.055653 | -2.197838 |
| C | 1.482660  | -2.740999 | -3.344736 |
| C | -0.733533 | -3.054465 | -2.197763 |
| C | -1.431991 | -3.390431 | -0.990711 |
| C | -0.733331 | -3.728032 | 0.215563  |
| C | 0.731838  | -3.727207 | 0.216061  |
| C | 1.480178  | -4.038664 | 1.364058  |
| C | 2.879586  | -3.994998 | 1.367291  |
| H | 3.448761  | -4.191864 | 2.279725  |
| H | 0.973546  | -4.287479 | 2.297617  |
| H | 3.457180  | -2.492140 | -4.231037 |
| H | 0.975891  | -2.484416 | -4.277453 |
| C | -1.483145 | -2.736567 | -3.344012 |
| C | -2.865162 | -3.379065 | -0.986667 |
| C | -1.482015 | -4.041703 | 1.362725  |
| C | -3.578613 | -3.049650 | -2.168360 |
| C | -2.883092 | -2.737383 | -3.334621 |
| H | -3.457369 | -2.484184 | -4.229977 |
| C | -3.579229 | -3.666274 | 0.206422  |
| C | -2.881436 | -3.998875 | 1.365364  |
| H | -3.450941 | -4.197666 | 2.277174  |
| C | -5.056426 | -2.979975 | -2.173785 |
| C | -5.051314 | -3.519833 | 0.266502  |
| H | -0.975638 | -4.291734 | 2.296076  |
| H | -0.976060 | -2.477710 | -4.275932 |
| O | 5.706547  | -2.725958 | -3.191928 |
| O | 5.687569  | -3.642592 | 1.321236  |
| O | -5.706986 | -2.719815 | -3.191987 |
| O | -5.689293 | -3.647391 | 1.319021  |
| N | 5.698424  | -3.183331 | -0.935715 |
| N | -5.699629 | -3.183090 | -0.937001 |
| C | 5.036459  | 3.503615  | -1.386534 |
| C | 3.571151  | 3.716167  | -1.359945 |
| C | 2.857757  | 3.750854  | -0.133633 |

|   |           |           |           |
|---|-----------|-----------|-----------|
| C | 3.563298  | 3.610475  | 1.091050  |
| C | 5.021469  | 3.352124  | 1.108660  |
| C | 2.880363  | 3.840042  | -2.564318 |
| C | 1.430206  | 3.889697  | -0.132436 |
| C | 0.732267  | 3.958625  | -1.384128 |
| C | 1.484336  | 3.955837  | -2.572211 |
| C | -0.733981 | 3.959156  | -1.383650 |
| C | -1.431194 | 3.889424  | -0.131577 |
| C | -0.732490 | 3.908193  | 1.120177  |
| C | 0.732192  | 3.908853  | 1.119721  |
| C | 1.479410  | 3.829696  | 2.309440  |
| C | 2.871047  | 3.668736  | 2.298010  |
| H | 3.436034  | 3.561126  | 3.227790  |
| H | 0.973525  | 3.855218  | 3.275849  |
| H | 3.452805  | 3.818267  | -3.495747 |
| H | 0.980130  | 4.020884  | -3.538910 |
| C | -1.486890 | 3.958400  | -2.571239 |
| C | -2.858755 | 3.750408  | -0.132118 |
| C | -1.478977 | 3.827867  | 2.310274  |
| C | -3.572928 | 3.716862  | -1.357990 |
| C | -2.882925 | 3.842508  | -2.562628 |
| H | -3.455945 | 3.822080  | -3.493733 |
| C | -3.563464 | 3.608789  | 1.092873  |
| C | -2.870534 | 3.666264  | 2.299457  |
| H | -3.434958 | 3.557740  | 3.229470  |
| C | -5.038249 | 3.504192  | -1.383909 |
| C | -5.021644 | 3.350576  | 1.111152  |
| H | -0.972699 | 3.852942  | 3.276489  |
| H | -0.983335 | 4.025337  | -3.538157 |
| O | 5.684069  | 3.466731  | -2.439103 |
| O | 5.650581  | 3.162764  | 2.155735  |
| O | -5.686499 | 3.467918  | -2.436091 |
| O | -5.650103 | 3.160080  | 2.158439  |
| N | 5.668130  | 3.319041  | -0.142007 |
| N | -5.669219 | 3.319159  | -0.138996 |
| C | 7.141345  | -2.848330 | -0.868475 |
| H | 7.553942  | -3.417039 | -0.024341 |
| H | 7.592681  | -3.182349 | -1.812745 |
| C | -7.142499 | -2.847792 | -0.869346 |
| H | -7.555132 | -3.417357 | -0.025808 |
| H | -7.593993 | -3.180699 | -1.813941 |
| C | -7.103790 | 2.950700  | -0.154433 |
| H | -7.562565 | 3.498330  | -0.989271 |
| H | -7.521348 | 3.293129  | 0.802270  |
| C | 7.102771  | 2.950719  | -0.158147 |
| H | 7.560854  | 3.497820  | -0.993714 |
| H | 7.520954  | 3.293908  | 0.798014  |
| C | 7.296682  | -1.353037 | -0.672901 |
| C | 7.392993  | -0.495865 | -1.784710 |
| C | 7.226510  | -0.792384 | 0.616986  |
| C | 7.374944  | 0.893223  | -1.613648 |
| H | 7.443975  | -0.926913 | -2.788529 |

|   |           |           |           |
|---|-----------|-----------|-----------|
| C | 7.205330  | 0.597145  | 0.787466  |
| H | 7.160299  | -1.456339 | 1.485137  |
| C | 7.259840  | 1.453051  | -0.328603 |
| H | 7.412762  | 1.556173  | -2.482953 |
| H | 7.114930  | 1.029789  | 1.788664  |
| C | -7.297643 | -1.352666 | -0.672255 |
| C | -7.224623 | -0.793001 | 0.617970  |
| C | -7.396586 | -0.494680 | -1.783132 |
| C | -7.203515 | 0.596352  | 0.789481  |
| H | -7.156552 | -1.457633 | 1.485476  |
| C | -7.378301 | 0.894307  | -1.611044 |
| H | -7.449544 | -0.924855 | -2.787206 |
| C | -7.260695 | 1.453121  | -0.325858 |
| H | -7.111156 | 1.028270  | 1.790788  |
| H | -7.417697 | 1.557894  | -2.479794 |
| P | 0.000895  | 0.805019  | 2.447672  |
| C | -1.313265 | 0.298382  | 1.314341  |
| C | 1.316665  | 0.299615  | 1.315769  |
| C | -1.222035 | -1.387906 | 3.626109  |
| C | 0.000990  | -0.778682 | 3.315468  |
| C | 2.440712  | -0.358717 | 1.832699  |
| C | -2.437437 | -0.360830 | 1.829824  |
| C | -2.323261 | 0.380620  | -0.884349 |
| H | -2.259458 | 0.614018  | -1.949874 |
| C | 2.328645  | 0.381292  | -0.881931 |
| H | 2.265889  | 0.614005  | -1.947670 |
| C | 1.234631  | -2.527873 | 4.441238  |
| H | 2.183659  | -2.992599 | 4.721377  |
| C | -1.202521 | 0.551973  | -0.059956 |
| C | 1.207018  | 0.552646  | -0.058695 |
| C | -1.232099 | -2.529465 | 4.439294  |
| H | -2.180983 | -2.995421 | 4.717903  |
| C | 3.583702  | -0.507922 | 1.039475  |
| H | 4.488798  | -0.959330 | 1.451213  |
| C | 1.224309  | -1.386470 | 3.627889  |
| C | -3.516725 | -0.088610 | -0.305884 |
| H | -4.412269 | -0.183486 | -0.927947 |
| C | -3.579746 | -0.509742 | 1.035523  |
| H | -4.485168 | -0.961281 | 1.446319  |
| C | 0.001256  | -3.059766 | 4.862997  |
| H | 0.001309  | -3.942447 | 5.509886  |
| C | 3.521709  | -0.087352 | -0.302222 |
| H | 4.417696  | -0.182538 | -0.923632 |
| O | 0.002399  | 0.985630  | -0.626428 |
| O | 2.431005  | -0.872268 | 3.140222  |
| O | -2.428761 | -0.875399 | 3.136844  |

Number of imaginary frequencies = 0

Computed total Gibbs free energy = -4544.3356 a.u.

**Lowest energy transition structure complexes between the inversion TSs of 1-6 and the PBI cyclophane catalyst**

**1**  
C -4.949902 -3.294822 1.251059  
C -3.473146 -3.386715 1.227759  
C -2.757785 -3.397022 0.000786  
C -3.473322 -3.388395 -1.226100  
C -4.950074 -3.296254 -1.249324  
C -2.776209 -3.393472 2.432972  
C -1.323790 -3.405424 0.000698  
C -0.625100 -3.401774 1.253235  
C -1.375467 -3.401229 2.441584  
C 0.840952 -3.382942 1.253729  
C 1.539395 -3.365514 0.000499  
C 0.840803 -3.384452 -1.252630  
C -0.625256 -3.403534 -1.251930  
C -1.375786 -3.404797 -2.440179  
C -2.776538 -3.396951 -2.431392  
H -3.349429 -3.381163 -3.362612  
H -0.868753 -3.402266 -3.407456  
H -3.348986 -3.376379 3.364238  
H -0.868301 -3.397200 3.408782  
C 1.592092 -3.374546 2.442112  
C 2.973839 -3.325515 0.000394  
C 1.591806 -3.377152 -2.441105  
C 3.689438 -3.304050 1.226968  
C 2.991764 -3.332851 2.433302  
H 3.565026 -3.316706 3.364302  
C 3.689304 -3.305009 -1.226285  
C 2.991480 -3.335063 -2.432500  
H 3.564615 -3.319595 -3.363592  
C 5.168768 -3.226231 1.249936  
C 5.168622 -3.226750 -1.249481  
H 1.085106 -3.396127 -3.408365  
H 1.085497 -3.392450 3.409445  
O -5.596145 -3.239429 2.303984  
O -5.596428 -3.241894 -2.302235  
O 5.813686 -3.185183 2.303833  
O 5.813387 -3.185873 -2.303476  
N -5.595687 -3.237653 0.000879  
N 5.816296 -3.182713 0.000180  
C -4.949117 3.296506 1.249379  
C -3.472361 3.388465 1.226166  
C -2.756838 3.397252 -0.000727  
C -3.472196 3.387184 -1.227703  
C -4.948958 3.295484 -1.251010  
C -2.775564 3.396655 2.431457  
C -1.322841 3.405466 -0.000637  
C -0.624295 3.403365 1.251982  
C -1.374813 3.404368 2.440239  
C 0.841765 3.384343 1.252672  
C 1.540349 3.365378 -0.000459  
C 0.841893 3.382820 -1.253683

|   |           |           |           |
|---|-----------|-----------|-----------|
| C | -0.624160 | 3.401883  | -1.253181 |
| C | -1.374525 | 3.401608  | -2.441533 |
| C | -2.775265 | 3.394015  | -2.432919 |
| H | -3.348051 | 3.377116  | -3.364183 |
| H | -0.867355 | 3.397670  | -3.408730 |
| H | -3.348453 | 3.380679  | 3.362675  |
| H | -0.867764 | 3.401498  | 3.407506  |
| C | 1.592786  | 3.377218  | 2.441135  |
| C | 2.974792  | 3.325349  | -0.000365 |
| C | 1.593028  | 3.374298  | -2.442066 |
| C | 3.690276  | 3.304944  | 1.226304  |
| C | 2.992466  | 3.335147  | 2.432521  |
| H | 3.565606  | 3.319792  | 3.363610  |
| C | 3.690388  | 3.303797  | -1.226940 |
| C | 2.992705  | 3.332541  | -2.433266 |
| H | 3.565952  | 3.316299  | -3.364273 |
| C | 5.169596  | 3.226525  | 1.249494  |
| C | 5.169721  | 3.225831  | -1.249912 |
| H | 1.086434  | 3.392156  | -3.409400 |
| H | 1.086107  | 3.396382  | 3.408403  |
| O | -5.595478 | 3.241937  | 2.302275  |
| O | -5.595215 | 3.240227  | -2.303936 |
| O | 5.814348  | 3.185729  | 2.303497  |
| O | 5.814615  | 3.184745  | -2.303818 |
| N | -5.594744 | 3.238355  | -0.000833 |
| N | 5.817262  | 3.182176  | -0.000164 |
| C | -7.043159 | -2.918307 | 0.000850  |
| H | -7.468634 | -3.378469 | -0.901176 |
| H | -7.468571 | -3.377905 | 0.903193  |
| C | 7.275390  | -2.911229 | 0.000079  |
| H | 7.683901  | -3.386147 | -0.902221 |
| H | 7.684029  | -3.386116 | 0.902338  |
| C | 7.276275  | 2.910197  | -0.000066 |
| H | 7.684934  | 3.384976  | 0.902239  |
| H | 7.685070  | 3.384961  | -0.902318 |
| C | -7.042314 | 2.919443  | -0.000829 |
| H | -7.467669 | 3.379702  | 0.901205  |
| H | -7.467574 | 3.379196  | -0.903165 |
| C | -7.217936 | -1.412695 | 0.000399  |
| C | -7.238953 | -0.698954 | 1.213151  |
| C | -7.238623 | -0.699654 | -1.212773 |
| C | -7.238746 | 0.700840  | 1.212748  |
| H | -7.220204 | -1.250365 | 2.157976  |
| C | -7.238426 | 0.700138  | -1.213178 |
| H | -7.219630 | -1.251617 | -2.157274 |
| C | -7.217516 | 1.413875  | -0.000416 |
| H | -7.219800 | 1.252797  | 2.157251  |
| H | -7.219263 | 1.251547  | -2.157995 |
| C | 7.498239  | -1.412419 | 0.000042  |
| C | 7.531846  | -0.700139 | -1.212905 |
| C | 7.531720  | -0.700076 | 1.212960  |
| C | 7.532066  | 0.698976  | -1.212940 |

|   |           |           |           |
|---|-----------|-----------|-----------|
| H | 7.508372  | -1.251283 | -2.157727 |
| C | 7.531901  | 0.699037  | 1.212924  |
| H | 7.508167  | -1.251175 | 2.157801  |
| C | 7.498644  | 1.411325  | -0.000027 |
| H | 7.508796  | 1.250081  | -2.157786 |
| H | 7.508506  | 1.250187  | 2.157744  |
| C | -2.741534 | 0.000774  | 0.735756  |
| H | -3.764019 | 0.001149  | 1.135514  |
| C | -2.741634 | -0.000322 | -0.735839 |
| H | -3.764170 | -0.000270 | -1.135472 |
| C | -1.778661 | -0.001382 | -1.693300 |
| H | -2.177663 | -0.002014 | -2.714952 |
| C | -0.305801 | -0.002032 | -1.691039 |
| H | 0.094436  | -0.003446 | -2.713340 |
| C | -1.778439 | 0.001553  | 1.693093  |
| H | -2.177311 | 0.002425  | 2.714795  |
| C | -0.305574 | 0.001578  | 1.690653  |
| H | 0.094790  | 0.002774  | 2.712905  |
| C | 0.659313  | 0.000393  | 0.735725  |
| C | 0.659209  | -0.001311 | -0.736232 |
| H | 1.680150  | 0.000774  | 1.137784  |
| H | 1.679991  | -0.002228 | -1.138427 |

Number of imaginary frequencies = 1 (-113.7 cm<sup>-1</sup>)  
 Computed total Gibbs free energy = -3594.2615 a.u.

**2**

|   |           |           |           |
|---|-----------|-----------|-----------|
| C | 5.054804  | -3.300283 | -1.250168 |
| C | 3.579037  | -3.406192 | -1.226922 |
| C | 2.864621  | -3.424581 | 0.000032  |
| C | 3.579006  | -3.406206 | 1.227001  |
| C | 5.054772  | -3.300333 | 1.250285  |
| C | 2.882405  | -3.426532 | -2.432850 |
| C | 1.431179  | -3.447420 | 0.000014  |
| C | 0.732586  | -3.454496 | -1.252495 |
| C | 1.482557  | -3.451501 | -2.441435 |
| C | -0.732633 | -3.454430 | -1.252516 |
| C | -1.431260 | -3.447405 | -0.000028 |
| C | -0.732669 | -3.454617 | 1.252480  |
| C | 0.732551  | -3.454553 | 1.252502  |
| C | 1.482490  | -3.451477 | 2.441461  |
| C | 2.882340  | -3.426490 | 2.432912  |
| H | 3.455134  | -3.406166 | 3.364082  |
| H | 0.974948  | -3.455857 | 3.408234  |
| H | 3.455223  | -3.406244 | -3.364006 |
| H | 0.975039  | -3.455939 | -3.408219 |
| C | -1.482571 | -3.451292 | -2.441477 |
| C | -2.864701 | -3.424552 | -0.000045 |
| C | -1.482644 | -3.451772 | 2.441417  |
| C | -3.579083 | -3.406083 | -1.227013 |
| C | -2.882419 | -3.426304 | -2.432925 |
| H | -3.455213 | -3.405931 | -3.364094 |

|   |           |           |           |
|---|-----------|-----------|-----------|
| C | -3.579123 | -3.406279 | 1.226906  |
| C | -2.882493 | -3.426775 | 2.432833  |
| H | -3.455311 | -3.406594 | 3.363992  |
| C | -5.054850 | -3.300218 | -1.250292 |
| C | -5.054889 | -3.300332 | 1.250159  |
| H | -0.975130 | -3.456361 | 3.408203  |
| H | -0.975030 | -3.455636 | -3.408250 |
| O | 5.700891  | -3.237956 | -2.302820 |
| O | 5.700839  | -3.238066 | 2.302952  |
| O | -5.700914 | -3.237924 | -2.302959 |
| O | -5.700975 | -3.238086 | 2.302815  |
| N | 5.700260  | -3.240360 | 0.000065  |
| N | -5.700339 | -3.240275 | -0.000073 |
| C | 5.054860  | 3.300341  | -1.250095 |
| C | 3.579095  | 3.406294  | -1.226826 |
| C | 2.864687  | 3.424555  | 0.000133  |
| C | 3.579083  | 3.406088  | 1.227093  |
| C | 5.054851  | 3.300254  | 1.250356  |
| C | 2.882454  | 3.426799  | -2.432746 |
| C | 1.431246  | 3.447399  | 0.000130  |
| C | 0.732643  | 3.454640  | -1.252371 |
| C | 1.482606  | 3.451806  | -2.441316 |
| C | -0.732576 | 3.454603  | -1.252379 |
| C | -1.431194 | 3.447421  | 0.000114  |
| C | -0.732590 | 3.454439  | 1.252617  |
| C | 0.732630  | 3.454393  | 1.252626  |
| C | 1.482580  | 3.451243  | 2.441577  |
| C | 2.882431  | 3.426281  | 2.433012  |
| H | 3.455234  | 3.405913  | 3.364175  |
| H | 0.975050  | 3.455570  | 3.408357  |
| H | 3.455262  | 3.406620  | -3.363910 |
| H | 0.975081  | 3.456403  | -3.408096 |
| C | -1.482525 | 3.451610  | -2.441333 |
| C | -2.864636 | 3.424589  | 0.000107  |
| C | -1.482551 | 3.451375  | 2.441562  |
| C | -3.579030 | 3.406293  | -1.226859 |
| C | -2.882375 | 3.426646  | -2.432774 |
| H | -3.455177 | 3.406383  | -3.363940 |
| C | -3.579042 | 3.406135  | 1.227064  |
| C | -2.882400 | 3.426401  | 2.432987  |
| H | -3.455210 | 3.406062  | 3.364147  |
| C | -5.054796 | 3.300418  | -1.250138 |
| C | -5.054809 | 3.300241  | 1.250316  |
| H | -0.975026 | 3.455765  | 3.408342  |
| H | -0.974990 | 3.456040  | -3.408110 |
| O | 5.700932  | 3.238079  | -2.302759 |
| O | 5.700931  | 3.237988  | 2.303015  |
| O | -5.700868 | 3.238195  | -2.302805 |
| O | -5.700892 | 3.237868  | 2.302967  |
| N | 5.700325  | 3.240304  | 0.000128  |
| N | -5.700274 | 3.240388  | 0.000083  |
| C | 7.146882  | -2.918717 | 0.000090  |

|   |           |           |           |
|---|-----------|-----------|-----------|
| H | 7.573079  | -3.377885 | 0.902303  |
| H | 7.573117  | -3.377891 | -0.902103 |
| C | -7.146960 | -2.918625 | -0.000092 |
| H | -7.573200 | -3.377818 | 0.902089  |
| H | -7.573161 | -3.377766 | -0.902317 |
| C | -7.146897 | 2.918751  | 0.000053  |
| H | -7.573093 | 3.377944  | -0.902148 |
| H | -7.573132 | 3.377904  | 0.902257  |
| C | 7.146946  | 2.918660  | 0.000132  |
| H | 7.573174  | 3.377841  | -0.902061 |
| H | 7.573159  | 3.377812  | 0.902346  |
| C | 7.320222  | -1.413168 | 0.000094  |
| C | 7.341252  | -0.699930 | -1.212958 |
| C | 7.341187  | -0.699947 | 1.213158  |
| C | 7.341274  | 0.699891  | -1.212949 |
| H | 7.322607  | -1.251866 | -2.157469 |
| C | 7.341210  | 0.699873  | 1.213168  |
| H | 7.322488  | -1.251895 | 2.157661  |
| C | 7.320266  | 1.413110  | 0.000113  |
| H | 7.322652  | 1.251839  | -2.157454 |
| H | 7.322539  | 1.251807  | 2.157679  |
| C | -7.320285 | -1.413076 | -0.000055 |
| C | -7.341339 | -0.699878 | 1.213019  |
| C | -7.341184 | -0.699818 | -1.213099 |
| C | -7.341316 | 0.699943  | 1.213052  |
| H | -7.322751 | -1.251845 | 2.157513  |
| C | -7.341160 | 0.700004  | -1.213063 |
| H | -7.322479 | -1.251736 | -2.157618 |
| C | -7.320239 | 1.413203  | 0.000014  |
| H | -7.322704 | 1.251862  | 2.157573  |
| H | -7.322427 | 1.251969  | -2.157555 |
| C | 0.614863  | 0.000041  | -1.561632 |
| C | -0.616107 | 0.000099  | -1.561218 |
| C | 0.616203  | -0.000146 | 1.560549  |
| C | -0.614767 | -0.000187 | 1.560959  |
| C | -2.025076 | 0.000185  | -1.679675 |
| H | -2.384793 | 0.000366  | -2.718127 |
| C | -3.009787 | 0.000067  | -0.729072 |
| H | -4.025784 | 0.000148  | -1.143781 |
| C | -3.009151 | -0.000153 | 0.730740  |
| H | -4.024786 | -0.000228 | 1.146324  |
| C | -2.023641 | -0.000260 | 1.680518  |
| H | -2.382508 | -0.000436 | 2.719265  |
| C | 2.025170  | -0.000100 | 1.679018  |
| H | 2.384882  | -0.000093 | 2.717471  |
| C | 3.009880  | -0.000069 | 0.728414  |
| H | 4.025880  | -0.000054 | 1.143117  |
| C | 3.009246  | -0.000054 | -0.731397 |
| H | 4.024884  | -0.000071 | -1.146971 |
| C | 2.023740  | -0.000023 | -1.681180 |
| H | 2.382615  | -0.000032 | -2.719925 |



Number of imaginary frequencies = 1 (-65.3 cm<sup>-1</sup>)  
Computed total Gibbs free energy = -3746.8562 a.u.

**3**

|   |           |           |           |
|---|-----------|-----------|-----------|
| C | 4.981880  | -3.285596 | -1.379868 |
| C | 3.506221  | -3.394456 | -1.353572 |
| C | 2.794376  | -3.405157 | -0.125380 |
| C | 3.509224  | -3.357627 | 1.099687  |
| C | 4.983062  | -3.236243 | 1.119471  |
| C | 2.808294  | -3.431648 | -2.558519 |
| C | 1.361429  | -3.436867 | -0.123247 |
| C | 0.660976  | -3.458051 | -1.374779 |
| C | 1.408453  | -3.462556 | -2.565144 |
| C | -0.804106 | -3.457367 | -1.372616 |
| C | -1.500364 | -3.442436 | -0.119013 |
| C | -0.799664 | -3.435300 | 1.133240  |
| C | 0.665436  | -3.429476 | 1.131194  |
| C | 1.415985  | -3.402686 | 2.318901  |
| C | 2.814518  | -3.363147 | 2.307437  |
| H | 3.387112  | -3.313264 | 3.237032  |
| H | 0.910180  | -3.382489 | 3.285857  |
| H | 3.379979  | -3.417884 | -3.490461 |
| H | 0.899334  | -3.477766 | -3.530662 |
| C | -1.555316 | -3.454261 | -2.560920 |
| C | -2.933477 | -3.415404 | -0.116737 |
| C | -1.546179 | -3.422543 | 2.323571  |
| C | -3.649649 | -3.398957 | -1.342321 |
| C | -2.955035 | -3.423860 | -2.549822 |
| H | -3.529846 | -3.404360 | -3.479795 |
| C | -3.644572 | -3.380458 | 1.111554  |
| C | -2.945410 | -3.391900 | 2.316590  |
| H | -3.515927 | -3.357407 | 3.248515  |
| C | -5.125347 | -3.291696 | -1.363253 |
| C | -5.120171 | -3.273065 | 1.137161  |
| H | -1.037286 | -3.410055 | 3.288945  |
| H | -1.048725 | -3.461943 | -3.528047 |
| O | 5.626057  | -3.235707 | -2.434768 |
| O | 5.629768  | -3.139445 | 2.169290  |
| O | -5.773373 | -3.235836 | -2.415139 |
| O | -5.763991 | -3.202753 | 2.190724  |
| N | 5.629627  | -3.213024 | -0.131821 |
| N | -5.768627 | -3.225306 | -0.112085 |
| C | 4.987287  | 3.283569  | -1.380987 |
| C | 3.511723  | 3.393565  | -1.353627 |
| C | 2.800574  | 3.402830  | -0.125044 |
| C | 3.516114  | 3.354549  | 1.099606  |
| C | 4.990062  | 3.234272  | 1.118375  |
| C | 2.813186  | 3.433134  | -2.558152 |
| C | 1.367635  | 3.434737  | -0.122077 |
| C | 0.666558  | 3.458834  | -1.373197 |
| C | 1.413367  | 3.465244  | -2.563976 |
| C | -0.798529 | 3.459702  | -1.370255 |

|   |           |           |           |
|---|-----------|-----------|-----------|
| C | -1.494190 | 3.442520  | -0.116353 |
| C | -0.792847 | 3.431381  | 1.135525  |
| C | 0.672247  | 3.425371  | 1.132699  |
| C | 1.423456  | 3.398028  | 2.319976  |
| C | 2.822016  | 3.358978  | 2.307699  |
| H | 3.395093  | 3.309008  | 3.237005  |
| H | 0.918240  | 3.377773  | 3.287229  |
| H | 3.384384  | 3.420463  | -3.490403 |
| H | 0.903744  | 3.482910  | -3.529194 |
| C | -1.550311 | 3.460218  | -2.558189 |
| C | -2.927329 | 3.417085  | -0.113465 |
| C | -1.538788 | 3.415585  | 2.326159  |
| C | -3.644125 | 3.404241  | -1.338730 |
| C | -2.950056 | 3.431229  | -2.546515 |
| H | -3.525331 | 3.414344  | -3.476248 |
| C | -3.637871 | 3.379998  | 1.115110  |
| C | -2.938053 | 3.386789  | 2.319774  |
| H | -3.508137 | 3.350285  | 3.251887  |
| C | -5.119928 | 3.298086  | -1.359261 |
| C | -5.113598 | 3.275039  | 1.141127  |
| H | -1.029496 | 3.399129  | 3.291257  |
| H | -1.044196 | 3.469826  | -3.525544 |
| O | 5.630609  | 3.233106  | -2.436374 |
| O | 5.637596  | 3.137904  | 2.167732  |
| O | -5.768388 | 3.244330  | -2.410989 |
| O | -5.757154 | 3.203646  | 2.194793  |
| N | 5.635839  | 3.210990  | -0.133377 |
| N | -5.762727 | 3.230679  | -0.107938 |
| C | 7.081797  | -2.916739 | -0.136151 |
| H | 7.502938  | -3.380353 | 0.766199  |
| H | 7.495551  | -3.387110 | -1.038538 |
| C | -7.217454 | -2.912764 | -0.111009 |
| H | -7.640394 | -3.374610 | 0.791422  |
| H | -7.640656 | -3.374922 | -1.013111 |
| C | -7.212053 | 2.920589  | -0.106464 |
| H | -7.635073 | 3.385078  | -1.007468 |
| H | -7.633607 | 3.381583  | 0.797041  |
| C | 7.087670  | 2.912637  | -0.138372 |
| H | 7.501519  | 3.381607  | -1.041439 |
| H | 7.510085  | 3.376343  | 0.763323  |
| C | 7.284324  | -1.415214 | -0.141652 |
| C | 7.252439  | -0.702172 | -1.355131 |
| C | 7.375070  | -0.702164 | 1.067792  |
| C | 7.253874  | 0.696820  | -1.355643 |
| H | 7.185902  | -1.254903 | -2.296926 |
| C | 7.376594  | 0.698420  | 1.067260  |
| H | 7.396364  | -1.253564 | 2.012438  |
| C | 7.287409  | 1.410713  | -0.142737 |
| H | 7.188340  | 1.249101  | -2.297763 |
| H | 7.398919  | 1.250558  | 2.011427  |
| C | -7.399649 | -1.408515 | -0.110936 |
| C | -7.430846 | -0.696603 | 1.102519  |

|   |           |           |           |
|---|-----------|-----------|-----------|
| C | -7.412518 | -0.694645 | -1.323695 |
| C | -7.429437 | 0.702961  | 1.103582  |
| H | -7.417435 | -1.249446 | 2.046512  |
| C | -7.411303 | 0.704667  | -1.322642 |
| H | -7.385411 | -1.246092 | -2.268269 |
| C | -7.397011 | 1.416672  | -0.108800 |
| H | -7.414888 | 1.254300  | 2.048442  |
| H | -7.383100 | 1.257510  | -2.266364 |
| C | -3.106375 | 0.000138  | 0.057092  |
| C | -2.640089 | 0.000103  | -1.277535 |
| C | -2.312449 | -0.001023 | 2.674601  |
| C | -2.212624 | -0.000711 | 1.215981  |
| C | -0.892534 | -0.001061 | 0.819654  |
| C | -1.218919 | -0.000426 | -1.633638 |
| C | -1.185529 | -0.001068 | 3.530556  |
| C | -0.386161 | -0.000331 | -2.837555 |
| C | 3.217639  | -0.001840 | -1.153909 |
| C | 3.627337  | -0.001886 | 0.199513  |
| C | 1.812162  | -0.001276 | -1.569419 |
| C | 0.976269  | -0.001202 | -0.474760 |
| C | 1.381742  | -0.001564 | 0.867938  |
| C | 2.683340  | -0.001658 | 1.318535  |
| C | 2.721109  | -0.001501 | 2.781025  |
| C | 1.559061  | -0.001118 | 3.588381  |
| C | 0.197733  | -0.001261 | 3.045412  |
| C | 0.227034  | -0.001361 | 1.668203  |
| C | 1.029619  | -0.000757 | -2.807224 |
| C | -0.430041 | -0.000826 | -0.504449 |
| H | 3.688403  | -0.001259 | 3.295557  |
| H | 1.712042  | -0.000890 | 4.673823  |
| H | -1.384166 | -0.001126 | 4.608602  |
| H | -3.300133 | -0.000952 | 3.148946  |
| H | -4.193312 | 0.000763  | 0.203971  |
| H | -3.402156 | 0.000544  | -2.064308 |
| H | -0.861088 | 0.000119  | -3.825326 |
| H | 1.546105  | -0.000631 | -3.773764 |
| H | 4.014240  | -0.002597 | -1.906132 |
| H | 4.705740  | -0.002545 | 0.391750  |

Number of imaginary frequencies = 1 (-73.2 cm<sup>-1</sup>)  
 Computed total Gibbs free energy = -4053.5951 a.u.

|          |          |          |           |
|----------|----------|----------|-----------|
| <b>4</b> |          |          |           |
| C        | 5.052548 | 3.339065 | 1.250844  |
| C        | 3.577334 | 3.452964 | 1.227135  |
| C        | 2.863757 | 3.480604 | -0.000825 |
| C        | 3.577060 | 3.451423 | -1.228942 |
| C        | 5.052300 | 3.337693 | -1.252880 |
| C        | 2.879650 | 3.454589 | 2.432926  |
| C        | 1.430765 | 3.504191 | -0.000646 |
| C        | 0.732378 | 3.501014 | 1.252372  |
| C        | 1.480142 | 3.478571 | 2.441507  |

|   |           |           |           |
|---|-----------|-----------|-----------|
| C | -0.733317 | 3.502546  | 1.252249  |
| C | -1.432148 | 3.483091  | -0.000364 |
| C | -0.733566 | 3.502135  | -1.253124 |
| C | 0.732100  | 3.499847  | -1.253502 |
| C | 1.479542  | 3.475583  | -2.442775 |
| C | 2.879048  | 3.451338  | -2.434542 |
| H | 3.450275  | 3.408439  | -3.365549 |
| H | 0.971832  | 3.444160  | -3.408369 |
| H | 3.451133  | 3.413025  | 3.363835  |
| H | 0.972753  | 3.448733  | 3.407345  |
| C | -1.483358 | 3.521239  | 2.440628  |
| C | -2.864947 | 3.445406  | -0.000208 |
| C | -1.483810 | 3.521270  | -2.441381 |
| C | -3.578847 | 3.421150  | 1.226301  |
| C | -2.883253 | 3.475628  | 2.431935  |
| H | -3.457071 | 3.466881  | 3.362896  |
| C | -3.579068 | 3.421679  | -1.226606 |
| C | -2.883711 | 3.476255  | -2.432374 |
| H | -3.457802 | 3.468052  | -3.363172 |
| C | -5.053035 | 3.292986  | 1.249699  |
| C | -5.053285 | 3.294128  | -1.249758 |
| H | -0.975918 | 3.561255  | -3.407306 |
| H | -0.975278 | 3.561058  | 3.406431  |
| O | 5.700114  | 3.277259  | 2.302353  |
| O | 5.699679  | 3.275033  | -2.304441 |
| O | -5.697567 | 3.221235  | 2.302721  |
| O | -5.698116 | 3.223666  | -2.302698 |
| N | 5.696178  | 3.261974  | -0.001042 |
| N | -5.698903 | 3.231843  | 0.000021  |
| C | 5.041340  | -3.343075 | 1.252409  |
| C | 3.565958  | -3.454464 | 1.228484  |
| C | 2.852656  | -3.482566 | 0.000400  |
| C | 3.566212  | -3.455282 | -1.227579 |
| C | 5.041613  | -3.343787 | -1.251314 |
| C | 2.868054  | -3.454233 | 2.434144  |
| C | 1.419640  | -3.504933 | 0.000309  |
| C | 0.721016  | -3.500496 | 1.253187  |
| C | 1.468541  | -3.477284 | 2.442469  |
| C | -0.744670 | -3.501648 | 1.252808  |
| C | -1.443251 | -3.482234 | 0.000071  |
| C | -0.744484 | -3.502449 | -1.252556 |
| C | 0.721210  | -3.501424 | -1.252672 |
| C | 1.468936  | -3.479104 | -2.441837 |
| C | 2.868461  | -3.455983 | -2.433336 |
| H | 3.439935  | -3.414762 | -3.364267 |
| H | 0.961474  | -3.448701 | -3.407602 |
| H | 3.439425  | -3.412290 | 3.365100  |
| H | 0.960952  | -3.446181 | 3.408155  |
| C | -1.494957 | -3.520207 | 2.441035  |
| C | -2.876022 | -3.443169 | -0.000032 |
| C | -1.494602 | -3.521716 | -2.440893 |
| C | -3.590130 | -3.418105 | 1.226330  |

|   |           |           |           |
|---|-----------|-----------|-----------|
| C | -2.894814 | -3.473451 | 2.432087  |
| H | -3.468772 | -3.464331 | 3.362957  |
| C | -3.589956 | -3.418939 | -1.226522 |
| C | -2.894472 | -3.475038 | -2.432153 |
| H | -3.468338 | -3.466475 | -3.363087 |
| C | -5.064163 | -3.287702 | 1.249459  |
| C | -5.063967 | -3.288585 | -1.249961 |
| H | -0.986609 | -3.562779 | -3.406715 |
| H | -0.987085 | -3.560668 | 3.406923  |
| O | 5.688804  | -3.281154 | 2.303982  |
| O | 5.689261  | -3.282471 | -2.302804 |
| O | -5.708770 | -3.215730 | 2.302404  |
| O | -5.708415 | -3.217286 | -2.303063 |
| N | 5.685460  | -3.268919 | 0.000590  |
| N | -5.709647 | -3.224053 | -0.000313 |
| C | 7.137232  | 2.916400  | -0.000959 |
| H | 7.570915  | 3.368496  | -0.903173 |
| H | 7.570847  | 3.368883  | 0.901088  |
| C | -7.148462 | 2.922567  | 0.000000  |
| H | -7.569587 | 3.386592  | -0.902226 |
| H | -7.569654 | 3.386425  | 0.902289  |
| C | -7.158241 | -2.910142 | -0.000538 |
| H | -7.581117 | -3.372849 | 0.901548  |
| H | -7.580673 | -3.372565 | -0.902972 |
| C | 7.127520  | -2.927329 | 0.000712  |
| H | 7.559708  | -3.380637 | 0.903034  |
| H | 7.559981  | -3.381169 | -0.901219 |
| C | 7.289495  | 1.407913  | -0.000572 |
| C | 7.304055  | 0.694458  | 1.212584  |
| C | 7.304207  | 0.693734  | -1.213300 |
| C | 7.301562  | -0.705201 | 1.213003  |
| H | 7.285581  | 1.246635  | 2.157041  |
| C | 7.301676  | -0.705916 | -1.212872 |
| H | 7.285895  | 1.245350  | -2.158090 |
| C | 7.284430  | -1.419334 | 0.000270  |
| H | 7.281202  | -1.256754 | 2.157781  |
| H | 7.281399  | -1.258094 | -2.157283 |
| C | -7.341632 | 1.419620  | -0.000141 |
| C | -7.370643 | 0.706631  | -1.213097 |
| C | -7.371782 | 0.706416  | 1.212646  |
| C | -7.373021 | -0.693292 | -1.213221 |
| H | -7.348554 | 1.258609  | -2.157523 |
| C | -7.374177 | -0.693503 | 1.212526  |
| H | -7.350577 | 1.258234  | 2.157184  |
| C | -7.346471 | -1.406580 | -0.000396 |
| H | -7.353003 | -1.245172 | -2.157761 |
| H | -7.355093 | -1.245521 | 2.157009  |
| C | 1.169420  | -0.001930 | -3.412854 |
| C | 2.434568  | -0.002342 | -2.683676 |
| C | 2.504859  | -0.001940 | -1.260940 |
| C | -0.101622 | -0.000942 | -2.763320 |
| C | -1.686783 | -0.000078 | -2.973473 |

|   |           |           |           |
|---|-----------|-----------|-----------|
| C | 1.174454  | -0.000132 | 3.412514  |
| C | -0.097531 | 0.000293  | 2.764830  |
| C | -1.682494 | 0.000885  | 2.977355  |
| C | 2.438512  | -0.000787 | 2.681500  |
| C | 2.506679  | -0.001092 | 1.258673  |
| C | 1.239275  | -0.000618 | 0.701479  |
| C | 0.048855  | 0.000201  | 1.388757  |
| C | -1.168255 | 0.000775  | 0.688288  |
| C | -2.286912 | 0.001183  | 1.502179  |
| C | -3.487908 | 0.001123  | 0.732912  |
| C | -3.488912 | 0.000933  | -0.726445 |
| C | -2.289052 | 0.000691  | -1.497457 |
| C | -1.169220 | 0.000560  | -0.685193 |
| C | 0.046882  | -0.000439 | -1.387466 |
| C | 1.238293  | -0.001041 | -0.701913 |
| C | 3.481336  | -0.001452 | -0.001837 |
| H | 3.347263  | -0.001114 | 3.293635  |
| H | 1.259241  | -0.000100 | 4.505570  |
| H | 3.342400  | -0.003126 | -3.297170 |
| H | 1.252624  | -0.002472 | -4.506035 |
| H | -4.478092 | 0.000622  | -1.197870 |
| H | -4.476433 | 0.000934  | 1.205743  |
| H | -2.016338 | -0.884740 | 3.545288  |
| H | -2.015734 | 0.886653  | 3.545428  |
| H | 4.150219  | 0.874961  | -0.002658 |
| H | 4.151718  | -0.876710 | -0.001991 |
| H | -2.020639 | 0.885652  | -3.541199 |
| H | -2.021660 | -0.885623 | -3.540854 |

Number of imaginary frequencies = 1 (-94.3 cm<sup>-1</sup>)  
 Computed total Gibbs free energy = -4092.907 a.u.

## 5

|   |           |          |           |
|---|-----------|----------|-----------|
| C | -5.046471 | 3.252322 | -1.302329 |
| C | -3.577463 | 3.423002 | -1.283146 |
| C | -2.865617 | 3.482274 | -0.056883 |
| C | -3.578825 | 3.469731 | 1.172023  |
| C | -5.051190 | 3.349913 | 1.197977  |
| C | -2.882160 | 3.452715 | -2.490995 |
| C | -1.432359 | 3.528647 | -0.058347 |
| C | -0.734043 | 3.544086 | -1.312438 |
| C | -1.484484 | 3.524718 | -2.501727 |
| C | 0.730437  | 3.544547 | -1.312234 |
| C | 1.428418  | 3.528811 | -0.057964 |
| C | 0.729337  | 3.537195 | 1.194247  |
| C | -0.733622 | 3.537627 | 1.194047  |
| C | -1.482403 | 3.545855 | 2.387093  |
| C | -2.880044 | 3.518425 | 2.378067  |
| H | -3.453080 | 3.504116 | 3.309056  |
| H | -0.973789 | 3.552923 | 3.352791  |
| H | -3.454714 | 3.398280 | -3.420540 |
| H | -0.976864 | 3.533982 | -3.468250 |

|   |           |           |           |
|---|-----------|-----------|-----------|
| C | 1.481215  | 3.526229  | -2.501322 |
| C | 2.861679  | 3.482686  | -0.056148 |
| C | 1.477768  | 3.543876  | 2.387529  |
| C | 3.573901  | 3.424492  | -1.282253 |
| C | 2.878925  | 3.454847  | -2.490277 |
| H | 3.451739  | 3.401409  | -3.419719 |
| C | 3.574541  | 3.469303  | 1.172955  |
| C | 2.875411  | 3.516502  | 2.378852  |
| H | 3.448195  | 3.501150  | 3.309978  |
| C | 5.043011  | 3.254597  | -1.301179 |
| C | 5.046945  | 3.350155  | 1.199203  |
| H | 0.968902  | 3.549535  | 3.353112  |
| H | 0.973849  | 3.535999  | -3.467966 |
| O | -5.687040 | 3.105681  | -2.351108 |
| O | -5.702233 | 3.321660  | 2.249616  |
| O | 5.683933  | 3.109203  | -2.349910 |
| O | 5.697711  | 3.321389  | 2.250998  |
| N | -5.694229 | 3.234368  | -0.053009 |
| N | 5.690422  | 3.236101  | -0.051696 |
| C | -5.043812 | -3.254054 | -1.302262 |
| C | -3.574688 | -3.423823 | -1.283491 |
| C | -2.862467 | -3.482872 | -0.057434 |
| C | -3.575331 | -3.470420 | 1.171678  |
| C | -5.047744 | -3.351162 | 1.198057  |
| C | -2.879725 | -3.453078 | -2.491545 |
| C | -1.429194 | -3.528893 | -0.059314 |
| C | -0.731221 | -3.543486 | -1.313610 |
| C | -1.482009 | -3.524280 | -2.502681 |
| C | 0.733262  | -3.542887 | -1.313809 |
| C | 1.431589  | -3.528490 | -0.059710 |
| C | 0.732865  | -3.538614 | 1.192681  |
| C | -0.730103 | -3.538262 | 1.192882  |
| C | -1.478528 | -3.545932 | 2.386148  |
| C | -2.876179 | -3.518555 | 2.377525  |
| H | -3.448930 | -3.503918 | 3.308683  |
| H | -0.969626 | -3.552212 | 3.351701  |
| H | -3.452579 | -3.398896 | -3.420918 |
| H | -0.974668 | -3.533200 | -3.469357 |
| C | 1.483707  | -3.522556 | -2.503071 |
| C | 2.864839  | -3.482048 | -0.058220 |
| C | 1.481645  | -3.547757 | 2.385723  |
| C | 3.576702  | -3.421921 | -1.284440 |
| C | 2.881398  | -3.450699 | -2.492310 |
| H | 3.453936  | -3.395672 | -3.421829 |
| C | 3.578040  | -3.470310 | 1.170701  |
| C | 2.879279  | -3.520077 | 2.376712  |
| H | 3.452323  | -3.506370 | 3.307705  |
| C | 5.045740  | -3.251452 | -1.303522 |
| C | 5.050382  | -3.350220 | 1.196741  |
| H | 0.973050  | -3.555824 | 3.351434  |
| H | 0.976082  | -3.530986 | -3.469593 |
| O | -5.684786 | -3.107992 | -2.350874 |

|   |           |           |           |
|---|-----------|-----------|-----------|
| O | -5.698469 | -3.322913 | 2.249889  |
| O | 5.686346  | -3.104500 | -2.352227 |
| O | 5.701375  | -3.322307 | 2.248419  |
| N | -5.691229 | -3.236328 | -0.052762 |
| N | 5.693457  | -3.234075 | -0.054172 |
| C | -7.141162 | 2.916357  | -0.045584 |
| H | -7.558251 | 3.385919  | 0.855825  |
| H | -7.572474 | 3.368832  | -0.948846 |
| C | 7.137671  | 2.919579  | -0.044087 |
| H | 7.554039  | 3.389073  | 0.857690  |
| H | 7.568734  | 3.373014  | -0.946990 |
| C | 7.140429  | -2.916263 | -0.046567 |
| H | 7.571751  | -3.368535 | -0.949930 |
| H | 7.557371  | -3.386158 | 0.854735  |
| C | -7.138433 | -2.919535 | -0.045040 |
| H | -7.569559 | -3.372573 | -0.948111 |
| H | -7.554908 | -3.389278 | 0.856559  |
| C | -7.329979 | 1.412525  | -0.032251 |
| C | -7.480144 | 0.698706  | -1.234972 |
| C | -7.234835 | 0.698262  | 1.178090  |
| C | -7.479483 | -0.702432 | -1.234843 |
| H | -7.549780 | 1.250600  | -2.177166 |
| C | -7.234132 | -0.701304 | 1.178216  |
| H | -7.121128 | 1.250720  | 2.115581  |
| C | -7.328616 | -1.415876 | -0.031988 |
| H | -7.548588 | -1.254577 | -2.176927 |
| H | -7.119815 | -1.253500 | 2.115786  |
| C | 7.328130  | 1.415958  | -0.031533 |
| C | 7.233517  | 0.700963  | 1.178414  |
| C | 7.479331  | 0.702906  | -1.234585 |
| C | 7.234183  | -0.698593 | 1.177796  |
| H | 7.119061  | 1.252781  | 2.116188  |
| C | 7.480021  | -0.698236 | -1.235198 |
| H | 7.548701  | 1.255382  | -2.176460 |
| C | 7.329497  | -1.412469 | -0.032764 |
| H | 7.120246  | -1.251347 | 2.115086  |
| H | 7.549898  | -1.249773 | -2.177584 |
| P | 0.000959  | -0.000183 | 0.149772  |
| C | 1.501978  | 0.000681  | -0.723496 |
| C | 2.720415  | 0.000141  | -0.002358 |
| C | 1.486388  | 0.001538  | -2.135119 |
| C | 3.931446  | 0.000660  | -0.711558 |
| C | 2.707806  | 0.002100  | -2.827087 |
| C | 3.915187  | 0.001671  | -2.114735 |
| H | 4.885395  | -0.000038 | -0.176648 |
| H | 2.715585  | 0.002786  | -3.921346 |
| H | 4.865884  | 0.002058  | -2.652131 |
| C | 0.001515  | -0.000705 | 1.876392  |
| C | 1.240496  | -0.001126 | 2.565668  |
| C | -1.237052 | -0.000856 | 2.566397  |
| C | 1.225996  | -0.001507 | 3.969600  |
| C | -1.221728 | -0.001389 | 3.970318  |



|   |           |           |           |
|---|-----------|-----------|-----------|
| C | 0.002340  | -0.001654 | 4.658595  |
| H | 2.170403  | -0.001750 | 4.522764  |
| H | -2.165811 | -0.001564 | 4.524034  |
| H | 0.002663  | -0.002002 | 5.752150  |
| C | -1.500507 | 0.000021  | -0.722699 |
| C | -2.718504 | -0.000507 | -0.000858 |
| C | -1.485642 | 0.000438  | -2.134323 |
| C | -3.929928 | -0.000770 | -0.709368 |
| C | -2.707455 | 0.000124  | -2.825608 |
| C | -3.914422 | -0.000527 | -2.112568 |
| H | -4.883593 | -0.001130 | -0.173953 |
| H | -2.715886 | 0.000440  | -3.919860 |
| H | -4.865393 | -0.000762 | -2.649474 |
| S | 2.865423  | -0.001570 | 1.787955  |
| S | -2.862425 | -0.000264 | 1.789595  |
| S | 0.000098  | 0.002086  | -3.157027 |

Number of imaginary frequencies = 1 (-328.9 cm<sup>-1</sup>)  
 Computed total Gibbs free energy = -5513.9529 a.u.

## 6

|   |           |           |           |
|---|-----------|-----------|-----------|
| C | 5.038850  | -3.271483 | -1.483500 |
| C | 3.563426  | -3.349455 | -1.457975 |
| C | 2.850913  | -3.323725 | -0.229843 |
| C | 3.565112  | -3.269209 | 0.996381  |
| C | 5.035637  | -3.164629 | 1.016085  |
| C | 2.864000  | -3.411627 | -2.664797 |
| C | 1.415998  | -3.337732 | -0.229251 |
| C | 0.716434  | -3.369982 | -1.481579 |
| C | 1.466644  | -3.422514 | -2.674103 |
| C | -0.747556 | -3.347456 | -1.479958 |
| C | -1.446727 | -3.342288 | -0.226235 |
| C | -0.745212 | -3.333142 | 1.027477  |
| C | 0.716827  | -3.311361 | 1.026387  |
| C | 1.469836  | -3.286707 | 2.219387  |
| C | 2.866094  | -3.257231 | 2.205318  |
| H | 3.440569  | -3.209828 | 3.133971  |
| H | 0.963450  | -3.271798 | 3.186496  |
| H | 3.438791  | -3.438688 | -3.594630 |
| H | 0.956887  | -3.472660 | -3.638217 |
| C | -1.499660 | -3.317967 | -2.671173 |
| C | -2.882859 | -3.327824 | -0.223740 |
| C | -1.497717 | -3.344281 | 2.219597  |
| C | -3.595350 | -3.300525 | -1.450770 |
| C | -2.896676 | -3.291997 | -2.659760 |
| H | -3.472185 | -3.260678 | -3.588936 |
| C | -3.598837 | -3.311004 | 1.004405  |
| C | -2.895476 | -3.329461 | 2.209317  |
| H | -3.467503 | -3.310127 | 3.140921  |
| C | -5.071680 | -3.236138 | -1.474955 |
| C | -5.071195 | -3.201154 | 1.028967  |
| H | -0.989931 | -3.347071 | 3.186337  |

|   |           |           |           |
|---|-----------|-----------|-----------|
| H | -0.990538 | -3.302689 | -3.637089 |
| O | 5.686524  | -3.252928 | -2.538791 |
| O | 5.682833  | -3.040286 | 2.065235  |
| O | -5.720176 | -3.211164 | -2.529338 |
| O | -5.723592 | -3.118936 | 2.078124  |
| N | 5.685192  | -3.189721 | -0.234270 |
| N | -5.718595 | -3.172062 | -0.224963 |
| C | 5.038770  | 3.271766  | -1.483236 |
| C | 3.563347  | 3.349760  | -1.457679 |
| C | 2.850845  | 3.323749  | -0.229546 |
| C | 3.565052  | 3.268987  | 0.996661  |
| C | 5.035576  | 3.164469  | 1.016333  |
| C | 2.863910  | 3.412231  | -2.664478 |
| C | 1.415931  | 3.337733  | -0.228934 |
| C | 0.716356  | 3.370310  | -1.481246 |
| C | 1.466553  | 3.423145  | -2.673765 |
| C | -0.747633 | 3.347774  | -1.479617 |
| C | -1.446793 | 3.342324  | -0.225891 |
| C | -0.745265 | 3.332866  | 1.027813  |
| C | 0.716772  | 3.311054  | 1.026705  |
| C | 1.469790  | 3.286134  | 2.219695  |
| C | 2.866047  | 3.256717  | 2.205604  |
| H | 3.440536  | 3.209143  | 3.134238  |
| H | 0.963417  | 3.270989  | 3.186806  |
| H | 3.438690  | 3.439512  | -3.594312 |
| H | 0.956786  | 3.473561  | -3.637860 |
| C | -1.499745 | 3.318550  | -2.670833 |
| C | -2.882924 | 3.327876  | -0.223390 |
| C | -1.497760 | 3.343787  | 2.219941  |
| C | -3.595427 | 3.300840  | -1.450420 |
| C | -2.896762 | 3.292575  | -2.659417 |
| H | -3.472276 | 3.261441  | -3.588597 |
| C | -3.598888 | 3.310819  | 1.004760  |
| C | -2.895518 | 3.329013  | 2.209669  |
| H | -3.467538 | 3.309512  | 3.141274  |
| C | -5.071756 | 3.236393  | -1.474606 |
| C | -5.071245 | 3.200988  | 1.029311  |
| H | -0.989968 | 3.346379  | 3.186678  |
| H | -0.990630 | 3.303455  | -3.636756 |
| O | 5.686434  | 3.253380  | -2.538537 |
| O | 5.682790  | 3.039954  | 2.065453  |
| O | -5.720260 | 3.211552  | -2.528987 |
| O | -5.723639 | 3.118600  | 2.078456  |
| N | 5.685118  | 3.189799  | -0.234024 |
| N | -5.718652 | 3.172079  | -0.224618 |
| C | 7.141004  | -2.911413 | -0.241063 |
| H | 7.558891  | -3.376702 | 0.662051  |
| H | 7.546571  | -3.389528 | -1.143055 |
| C | -7.178020 | -2.911339 | -0.230023 |
| H | -7.587143 | -3.377751 | 0.676284  |
| H | -7.579901 | -3.398396 | -1.129204 |
| C | -7.178064 | 2.911295  | -0.229689 |

|   |           |           |           |
|---|-----------|-----------|-----------|
| H | -7.579968 | 3.398427  | -1.128819 |
| H | -7.587201 | 3.377601  | 0.676666  |
| C | 7.140936  | 2.911533  | -0.240849 |
| H | 7.546494  | 3.389760  | -1.142785 |
| H | 7.558800  | 3.376736  | 0.662321  |
| C | 7.355491  | -1.412023 | -0.250748 |
| C | 7.311662  | -0.699357 | -1.463676 |
| C | 7.463642  | -0.699863 | 0.957318  |
| C | 7.311646  | 0.699563  | -1.463634 |
| H | 7.236732  | -1.252480 | -2.404783 |
| C | 7.463641  | 0.699912  | 0.957355  |
| H | 7.502328  | -1.252648 | 1.900455  |
| C | 7.355474  | 1.412148  | -0.250663 |
| H | 7.236698  | 1.252748  | -2.404703 |
| H | 7.502317  | 1.252646  | 1.900520  |
| C | -7.417712 | -1.414487 | -0.246796 |
| C | -7.600237 | -0.701320 | 0.951551  |
| C | -7.323826 | -0.699265 | -1.456887 |
| C | -7.600233 | 0.701128  | 0.951639  |
| H | -7.681020 | -1.252848 | 1.893636  |
| C | -7.323820 | 0.699363  | -1.456798 |
| H | -7.201766 | -1.251020 | -2.393468 |
| C | -7.417703 | 1.414436  | -0.246618 |
| H | -7.681024 | 1.252542  | 1.893791  |
| H | -7.201750 | 1.251237  | -2.393308 |
| P | 0.056131  | -0.000095 | 0.755460  |
| C | 0.619622  | 0.000007  | -0.788432 |
| C | -0.391469 | 0.000135  | -1.767269 |
| C | 2.024775  | 0.000080  | -0.894124 |
| C | 0.104015  | 0.000294  | -3.073256 |
| C | 2.492322  | 0.000241  | -2.209324 |
| C | 1.518663  | 0.000331  | -3.246492 |
| H | -0.561095 | 0.000402  | -3.939928 |
| H | 3.559742  | 0.000306  | -2.442551 |
| H | 1.892839  | 0.000457  | -4.273927 |
| C | -1.563622 | -0.000165 | 1.043542  |
| C | -2.359623 | -0.000014 | -0.116503 |
| C | -1.903488 | -0.000256 | 2.408290  |
| C | -3.731301 | 0.000009  | 0.144221  |
| C | -3.280981 | -0.000231 | 2.641807  |
| C | -4.137703 | -0.000117 | 1.508879  |
| H | -4.484842 | 0.000114  | -0.647569 |
| H | -3.703317 | -0.000315 | 3.648922  |
| H | -5.212501 | -0.000143 | 1.696242  |
| C | 1.125008  | -0.000234 | 2.009359  |
| C | 0.518866  | -0.000331 | 3.276036  |
| C | 2.475939  | -0.000130 | 1.625524  |
| C | 1.438615  | -0.000368 | 4.334006  |
| C | 3.374841  | -0.000178 | 2.696772  |
| C | 2.823215  | -0.000298 | 4.007085  |
| H | 1.117138  | -0.000445 | 5.378354  |
| H | 4.456866  | -0.000061 | 2.542406  |

|   |           |           |           |
|---|-----------|-----------|-----------|
| H | 3.530589  | -0.000325 | 4.840909  |
| O | 2.872211  | 0.000053  | 0.256042  |
| O | -1.779040 | 0.000108  | -1.429204 |
| O | -0.902366 | -0.000372 | 3.439860  |

Number of imaginary frequencies = 1 (-356.7 cm<sup>-1</sup>)  
Computed total Gibbs free energy = -4544.2117 a.u.

## Catalysis of the sumanene bowl inversion with a di-core-substituted PBI cyclophane

di-core-substituted PBI cyclophane

|   |           |           |           |
|---|-----------|-----------|-----------|
| C | -5.008913 | -1.441554 | -2.827290 |
| C | -3.532367 | -1.350572 | -2.723469 |
| C | -2.858651 | -0.107523 | -2.850048 |
| C | -3.612991 | 1.072137  | -3.071496 |
| C | -5.091163 | 1.032797  | -3.161218 |
| C | -2.812941 | -2.503222 | -2.450536 |
| C | -1.428072 | -0.060231 | -2.762135 |
| C | -0.676422 | -1.278884 | -2.627123 |
| C | -1.408048 | -2.467368 | -2.366109 |
| C | 0.775336  | -1.221219 | -2.795900 |
| C | 1.427289  | 0.061318  | -2.762017 |
| C | 0.675646  | 1.279976  | -2.626745 |
| C | -0.776146 | 1.222349  | -2.795490 |
| C | -1.563977 | 2.369504  | -3.034075 |
| C | -2.953780 | 2.293835  | -3.187431 |
| H | -3.550944 | 3.188352  | -3.386073 |
| H | -1.081116 | 3.341722  | -3.104922 |
| H | -3.354633 | -3.442060 | -2.311464 |
| C | 1.562997  | -2.368332 | -3.035198 |
| C | 2.857878  | 0.108473  | -2.849891 |
| C | 1.407422  | 2.468388  | -2.365770 |
| C | 3.612087  | -1.071150 | -3.071958 |
| C | 2.952792  | -2.292736 | -3.188581 |
| H | 3.549849  | -3.187176 | -3.387876 |
| C | 3.531726  | 1.351404  | -2.722913 |
| C | 2.812336  | 2.504074  | -2.450039 |
| H | 3.354101  | 3.442867  | -2.310951 |
| C | 5.090229  | -1.031889 | -3.161885 |
| C | 5.008309  | 1.442269  | -2.826470 |
| H | 1.079975  | -3.340427 | -3.106697 |
| O | -5.614163 | -2.513753 | -2.722416 |
| O | -5.771596 | 2.050821  | -3.330841 |
| O | 5.770550  | -2.049886 | -3.332197 |
| O | 5.613679  | 2.514320  | -2.720904 |
| N | -5.699245 | -0.232064 | -3.027130 |
| N | 5.698470  | 0.232835  | -3.027193 |
| C | -5.090309 | -1.031717 | 3.162367  |
| C | -3.612190 | -1.071321 | 3.072282  |
| C | -2.857758 | 0.108160  | 2.850222  |

|   |           |           |           |
|---|-----------|-----------|-----------|
| C | -3.531316 | 1.351257  | 2.723261  |
| C | -5.007858 | 1.442452  | 2.826896  |
| C | -2.953164 | -2.293063 | 3.188723  |
| C | -1.427195 | 0.060658  | 2.762233  |
| C | -0.775499 | -1.222025 | 2.795988  |
| C | -1.563397 | -2.368985 | 3.035228  |
| C | 0.676230  | -1.280004 | 2.627077  |
| C | 1.428158  | -0.061506 | 2.762106  |
| C | 0.776484  | 1.221199  | 2.795571  |
| C | -0.675304 | 1.279147  | 2.626937  |
| C | -1.406781 | 2.467754  | 2.365987  |
| C | -2.811680 | 2.503774  | 2.450335  |
| H | -3.353258 | 3.442680  | 2.311276  |
| H | -3.550434 | -3.187379 | 3.387945  |
| H | -1.080630 | -3.341224 | 3.106532  |
| C | 1.407576  | -2.468614 | 2.365987  |
| C | 2.858721  | -0.109102 | 2.849943  |
| C | 1.564534  | 2.368203  | 3.034175  |
| C | 3.532199  | -1.352275 | 2.723099  |
| C | 2.812485  | -2.504744 | 2.450169  |
| H | 3.353954  | -3.443686 | 2.310925  |
| C | 3.613261  | 1.070403  | 3.071528  |
| C | 2.954316  | 2.292237  | 3.187524  |
| H | 3.551694  | 3.186604  | 3.386206  |
| C | 5.008731  | -1.443547 | 2.826708  |
| C | 5.091394  | 1.030715  | 3.161494  |
| H | 1.081870  | 3.340520  | 3.105077  |
| O | -5.770889 | -2.049571 | 3.332519  |
| O | -5.613076 | 2.514566  | 2.721123  |
| O | 5.613862  | -2.515745 | 2.721165  |
| O | 5.772060  | 2.048529  | 3.331454  |
| N | -5.698240 | 0.233177  | 3.027900  |
| N | 5.699214  | -0.234270 | 3.027302  |
| C | -7.177611 | -0.266252 | -2.878895 |
| H | -7.572197 | 0.570859  | -3.470217 |
| H | -7.518301 | -1.225116 | -3.292213 |
| C | 7.176883  | 0.266781  | -2.879473 |
| H | 7.517588  | 1.225830  | -3.292352 |
| H | 7.571111  | -0.570048 | -3.471436 |
| C | 7.177598  | -0.268650 | 2.879313  |
| H | 7.518069  | -1.227752 | 3.292260  |
| H | 7.572216  | 0.568139  | 3.471066  |
| C | -7.176639 | 0.267440  | 2.880120  |
| H | -7.571062 | -0.569425 | 3.471901  |
| H | -7.517190 | 1.226473  | 3.293156  |
| C | -7.498383 | -0.131355 | -1.404066 |
| C | -7.549793 | -1.272626 | -0.582541 |
| C | -7.552301 | 1.142561  | -0.808845 |
| C | -7.549531 | -1.141998 | 0.810224  |
| H | -7.519169 | -2.264960 | -1.041397 |
| C | -7.552202 | 1.273190  | 0.583954  |
| H | -7.524906 | 2.032668  | -1.444501 |

|   |           |           |           |
|---|-----------|-----------|-----------|
| C | -7.497969 | 0.132052  | 1.405440  |
| H | -7.519908 | -2.032006 | 1.445900  |
| H | -7.523429 | 2.265614  | 1.042746  |
| C | 7.498283  | 0.131040  | -1.404843 |
| C | 7.552103  | 1.271960  | -0.583018 |
| C | 7.550314  | -1.143157 | -0.810012 |
| C | 7.552170  | 1.140929  | 0.809735  |
| H | 7.522991  | 2.264498  | -1.041542 |
| C | 7.550566  | -1.274192 | 0.582723  |
| H | 7.521100  | -2.033000 | -1.445941 |
| C | 7.498626  | -0.133191 | 1.404583  |
| H | 7.524380  | 2.030829  | 1.445657  |
| H | 7.520308  | -2.266679 | 1.041267  |
| O | 0.717979  | 3.626413  | -2.079713 |
| O | -0.718371 | -3.625170 | -2.079744 |
| O | -0.716982 | 3.625544  | 2.079932  |
| O | 0.717695  | -3.626422 | 2.079979  |
| C | 1.300299  | -4.564547 | 1.223612  |
| C | 1.144151  | -5.911862 | 1.566511  |
| C | 1.940495  | -4.180885 | 0.036120  |
| C | 1.651873  | -6.894885 | 0.708137  |
| H | 0.625263  | -6.171091 | 2.492886  |
| C | 2.455654  | -5.176301 | -0.802563 |
| H | 2.027960  | -3.124669 | -0.231078 |
| C | 2.316093  | -6.532054 | -0.472129 |
| H | 1.530290  | -7.950368 | 0.970012  |
| H | 2.967855  | -4.882555 | -1.723564 |
| H | 2.722269  | -7.302954 | -1.133601 |
| C | 1.301452  | 4.564702  | -1.224082 |
| C | 1.146468  | 5.911914  | -1.567847 |
| C | 1.941550  | 4.181214  | -0.036470 |
| C | 1.655141  | 6.895045  | -0.710122 |
| H | 0.627747  | 6.171038  | -2.494341 |
| C | 2.457606  | 5.176695  | 0.801558  |
| H | 2.028327  | 3.125074  | 0.231284  |
| C | 2.319095  | 6.532374  | 0.470328  |
| H | 1.534463  | 7.950466  | -0.972661 |
| H | 2.969692  | 4.883115  | 1.722682  |
| H | 2.725972  | 7.303326  | 1.131311  |
| C | -1.300113 | 4.564184  | 1.224451  |
| C | -1.144032 | 5.911302  | 1.568118  |
| C | -1.940842 | 4.181113  | 0.037068  |
| C | -1.652319 | 6.894770  | 0.710566  |
| H | -0.624730 | 6.170064  | 2.494388  |
| C | -2.456499 | 5.176951  | -0.800804 |
| H | -2.028370 | 3.125043  | -0.230695 |
| C | -2.316979 | 6.532528  | -0.469627 |
| H | -1.530784 | 7.950115  | 0.973015  |
| H | -2.969100 | 4.883693  | -1.721740 |
| H | -2.723545 | 7.303753  | -1.130481 |
| C | -1.302001 | -4.563673 | -1.224480 |
| C | -1.147352 | -5.910792 | -1.568766 |

|   |           |           |           |
|---|-----------|-----------|-----------|
| C | -1.941719 | -4.180507 | -0.036555 |
| C | -1.655898 | -6.894130 | -0.711231 |
| H | -0.628945 | -6.169674 | -2.495508 |
| C | -2.457715 | -5.176197 | 0.801270  |
| H | -2.028232 | -3.124435 | 0.231555  |
| C | -2.319463 | -6.531777 | 0.469544  |
| H | -1.535452 | -7.949482 | -0.974155 |
| H | -2.969508 | -4.882834 | 1.722623  |
| H | -2.726215 | -7.302920 | 1.130382  |

Number of imaginary frequencies = 0

Computed total Gibbs free energy = -4511.029 a.u.

Equilibrium structure complex with compound 4

|   |           |           |           |
|---|-----------|-----------|-----------|
| C | -4.918090 | -1.198572 | 3.261324  |
| C | -3.497350 | -1.606806 | 3.382443  |
| C | -2.891915 | -2.481248 | 2.442101  |
| C | -3.692384 | -3.035672 | 1.412877  |
| C | -5.132830 | -2.717412 | 1.294799  |
| C | -2.764142 | -1.138853 | 4.460219  |
| C | -1.491776 | -2.788707 | 2.538860  |
| C | -0.707170 | -2.203045 | 3.593123  |
| C | -1.404851 | -1.470726 | 4.590485  |
| C | 0.752551  | -2.306391 | 3.517663  |
| C | 1.346472  | -3.128556 | 2.493841  |
| C | 0.543632  | -3.896068 | 1.572947  |
| C | -0.908316 | -3.673070 | 1.560979  |
| C | -1.761670 | -4.238578 | 0.587453  |
| C | -3.120326 | -3.922195 | 0.507598  |
| H | -3.758035 | -4.369277 | -0.260000 |
| H | -1.363634 | -4.945380 | -0.131507 |
| H | -3.258035 | -0.513808 | 5.208222  |
| C | 1.606179  | -1.534307 | 4.335173  |
| C | 2.776659  | -3.123138 | 2.355740  |
| C | 1.236917  | -4.746656 | 0.671677  |
| C | 3.583214  | -2.269571 | 3.152106  |
| C | 2.988657  | -1.492623 | 4.140344  |
| H | 3.620123  | -0.833866 | 4.742209  |
| C | 3.405508  | -3.949396 | 1.389085  |
| C | 2.636065  | -4.787542 | 0.597693  |
| H | 3.126762  | -5.446745 | -0.123053 |
| C | 5.035094  | -2.133905 | 2.906624  |
| C | 4.870586  | -3.919926 | 1.174437  |
| H | 1.178701  | -0.913481 | 5.116416  |
| O | -5.438672 | -0.374373 | 4.022150  |
| O | -5.855932 | -3.215147 | 0.424278  |
| O | 5.736606  | -1.303747 | 3.499717  |
| O | 5.435528  | -4.642519 | 0.345136  |
| N | -5.657426 | -1.808186 | 2.231718  |
| N | 5.595922  | -2.992223 | 1.942918  |
| C | -5.081330 | 3.682703  | -1.908799 |

|   |           |           |           |
|---|-----------|-----------|-----------|
| C | -3.610140 | 3.592645  | -2.040325 |
| C | -2.991245 | 2.525263  | -2.739215 |
| C | -3.811388 | 1.566755  | -3.389310 |
| C | -5.291319 | 1.645100  | -3.332356 |
| C | -2.818240 | 4.525755  | -1.380000 |
| C | -1.561824 | 2.386380  | -2.768508 |
| C | -0.763018 | 3.330126  | -2.025112 |
| C | -1.427579 | 4.387630  | -1.365661 |
| C | 0.690678  | 3.143974  | -1.960952 |
| C | 1.289301  | 2.098946  | -2.755868 |
| C | 0.493431  | 1.222679  | -3.576498 |
| C | -0.965576 | 1.290446  | -3.485131 |
| C | -1.843216 | 0.313463  | -4.034522 |
| C | -3.238800 | 0.471793  | -4.015848 |
| H | -3.892357 | -0.274163 | -4.474726 |
| H | -3.308288 | 5.343600  | -0.844783 |
| H | -0.845799 | 5.109849  | -0.802389 |
| C | 1.573654  | 3.949189  | -1.192179 |
| C | 2.716143  | 1.940442  | -2.780632 |
| C | 1.158590  | 0.342958  | -4.460554 |
| C | 3.533384  | 2.736955  | -1.938273 |
| C | 2.958487  | 3.718730  | -1.151790 |
| H | 3.595525  | 4.328450  | -0.506882 |
| C | 3.336686  | 0.994169  | -3.634604 |
| C | 2.551474  | 0.228870  | -4.491749 |
| H | 3.045782  | -0.467774 | -5.174541 |
| C | 4.997455  | 2.535312  | -1.859404 |
| C | 4.802212  | 0.791215  | -3.628040 |
| H | 0.574670  | -0.267027 | -5.143707 |
| O | -5.634685 | 4.563907  | -1.240066 |
| O | -6.021504 | 0.823793  | -3.896207 |
| O | 5.709257  | 3.161614  | -1.061887 |
| O | 5.362475  | -0.040917 | -4.350505 |
| N | -5.832767 | 2.677276  | -2.546449 |
| N | 5.547853  | 1.583123  | -2.729129 |
| C | -7.078831 | -1.426344 | 2.076600  |
| H | -7.629563 | -2.342797 | 1.820468  |
| H | -7.398988 | -1.053729 | 3.059751  |
| C | 7.025839  | -2.803125 | 1.608581  |
| H | 7.402514  | -3.782660 | 1.283277  |
| H | 7.526702  | -2.488579 | 2.534389  |
| C | 6.989238  | 1.270045  | -2.574354 |
| H | 7.488746  | 2.209480  | -2.300611 |
| H | 7.338748  | 0.922119  | -3.555946 |
| C | -7.265990 | 2.560890  | -2.185051 |
| H | -7.593748 | 3.567751  | -1.892974 |
| H | -7.806468 | 2.226523  | -3.080883 |
| C | -7.252612 | -0.373375 | 1.002146  |
| C | -6.953087 | 0.975147  | 1.275062  |
| C | -7.651826 | -0.736262 | -0.294527 |
| C | -7.021810 | 1.934492  | 0.259415  |
| H | -6.647532 | 1.260200  | 2.287272  |



|   |           |           |           |
|---|-----------|-----------|-----------|
| C | -7.716669 | 0.222457  | -1.312587 |
| H | -7.868089 | -1.786011 | -0.512282 |
| C | -7.386171 | 1.562362  | -1.050447 |
| H | -6.769695 | 2.979112  | 0.469077  |
| H | -7.980434 | -0.074671 | -2.331768 |
| C | 7.172643  | -1.761340 | 0.517909  |
| C | 7.073299  | -2.130808 | -0.836264 |
| C | 7.313943  | -0.401008 | 0.846751  |
| C | 7.071360  | -1.154974 | -1.839540 |
| H | 6.960036  | -3.188018 | -1.093913 |
| C | 7.313801  | 0.575511  | -0.155915 |
| H | 7.387278  | -0.111945 | 1.899375  |
| C | 7.169133  | 0.209553  | -1.507220 |
| H | 6.955992  | -1.442504 | -2.888992 |
| H | 7.386028  | 1.635205  | 0.105528  |
| O | -1.305410 | -0.810674 | -4.624625 |
| O | 1.084177  | 4.968051  | -0.400675 |
| O | 0.545736  | -5.616422 | -0.157665 |
| O | -0.747060 | -1.125069 | 5.750565  |
| C | -2.033694 | -2.005079 | -4.653196 |
| C | -2.607984 | -2.548479 | -3.494516 |
| C | -2.080413 | -2.681779 | -5.876949 |
| C | -3.244649 | -3.792129 | -3.577255 |
| H | -2.555815 | -2.012796 | -2.544232 |
| C | -2.716194 | -3.929227 | -5.941168 |
| H | -1.624321 | -2.223561 | -6.758904 |
| C | -3.300548 | -4.485857 | -4.794881 |
| H | -3.699155 | -4.217880 | -2.677736 |
| H | -2.759442 | -4.461901 | -6.896243 |
| H | -3.800781 | -5.457142 | -4.849544 |
| C | 1.766681  | 6.184637  | -0.382228 |
| C | 2.349288  | 6.727493  | -1.537943 |
| C | 1.766758  | 6.887970  | 0.828491  |
| C | 2.955530  | 7.987542  | -1.462965 |
| H | 2.324607  | 6.169647  | -2.477865 |
| C | 2.370045  | 8.150598  | 0.884258  |
| H | 1.297939  | 6.435112  | 1.704519  |
| C | 2.970134  | 8.702760  | -0.256513 |
| H | 3.412826  | 8.414459  | -2.360888 |
| H | 2.374524  | 8.701430  | 1.829905  |
| H | 3.445367  | 9.686662  | -0.206758 |
| C | 0.584724  | -5.423281 | -1.538575 |
| C | -0.167375 | -6.340238 | -2.289652 |
| C | 1.250952  | -4.357894 | -2.160378 |
| C | -0.264500 | -6.172388 | -3.675240 |
| H | -0.672130 | -7.162150 | -1.773787 |
| C | 1.139728  | -4.205279 | -3.550057 |
| H | 1.828577  | -3.644291 | -1.569754 |
| C | 0.383189  | -5.103245 | -4.312894 |
| H | -0.862077 | -6.878848 | -4.259553 |
| H | 1.644812  | -3.360461 | -4.030679 |
| H | 0.284797  | -4.965109 | -5.392770 |

|   |           |           |           |
|---|-----------|-----------|-----------|
| C | -1.076037 | 0.079535  | 6.381006  |
| C | -1.363799 | 0.042856  | 7.749139  |
| C | -1.017521 | 1.287079  | 5.673582  |
| C | -1.606243 | 1.250501  | 8.419240  |
| H | -1.393442 | -0.919667 | 8.266782  |
| C | -1.263065 | 2.483617  | 6.356137  |
| H | -0.762461 | 1.283642  | 4.611214  |
| C | -1.560433 | 2.469918  | 7.727528  |
| H | -1.835878 | 1.234116  | 9.489111  |
| H | -1.201929 | 3.429790  | 5.808646  |
| H | -1.750956 | 3.407651  | 8.257860  |
| C | 0.894503  | 3.804035  | 2.817105  |
| C | 2.284339  | 3.461675  | 2.658991  |
| C | 2.684806  | 2.164727  | 2.283078  |
| C | -0.130675 | 2.865231  | 2.594667  |
| C | -1.640013 | 2.915297  | 2.206247  |
| C | 2.606912  | -1.158595 | -1.023534 |
| C | 1.269345  | -1.187905 | -0.577711 |
| C | -0.131238 | -1.432993 | -1.210754 |
| C | 3.626901  | -0.432909 | -0.312609 |
| C | 3.323601  | 0.301864  | 0.849824  |
| C | 2.021026  | 0.133488  | 1.346431  |
| C | 1.041419  | -0.584222 | 0.668656  |
| C | -0.340767 | -0.253779 | 0.836286  |
| C | -1.092039 | -0.625002 | -0.289388 |
| C | -2.340907 | 0.016554  | -0.416410 |
| C | -2.722867 | 1.101253  | 0.447260  |
| C | -1.861246 | 1.566776  | 1.459684  |
| C | -0.708572 | 0.795022  | 1.675115  |
| C | 0.303733  | 1.550847  | 2.351118  |
| C | 1.648401  | 1.218149  | 2.201016  |
| C | 3.932403  | 1.515857  | 1.609911  |
| H | 4.619853  | -0.379958 | -0.769286 |
| H | 2.889264  | -1.579871 | -1.994961 |
| H | 3.012183  | 4.278547  | 2.725370  |
| H | 0.653447  | 4.855136  | 3.011846  |
| H | -3.655509 | 1.624941  | 0.211666  |
| H | -3.010777 | -0.199624 | -1.255122 |
| H | -0.162378 | -1.089234 | -2.256434 |
| H | -0.392007 | -2.507274 | -1.235811 |
| H | 4.666583  | 1.172046  | 2.365573  |
| H | 4.468552  | 2.208754  | 0.940346  |
| H | -2.299125 | 3.016900  | 3.090636  |
| H | -1.857896 | 3.772638  | 1.546038  |

Number of imaginary frequencies = 1 (-356.7 cm<sup>-1</sup>)  
 Computed total Gibbs free energy = -5319.711 a.u.

Transition structure complex with compound 4

|   |           |           |           |
|---|-----------|-----------|-----------|
| C | -5.091962 | -0.122976 | -4.143460 |
| C | -3.611894 | -0.073741 | -4.096423 |

|   |           |           |           |
|---|-----------|-----------|-----------|
| C | -2.914025 | 1.051228  | -3.586971 |
| C | -3.667341 | 2.177096  | -3.164049 |
| C | -5.146457 | 2.171107  | -3.172136 |
| C | -2.904089 | -1.196572 | -4.494791 |
| C | -1.478110 | 1.037807  | -3.496590 |
| C | -0.746342 | -0.139811 | -3.897685 |
| C | -1.510676 | -1.243804 | -4.367345 |
| C | 0.717701  | -0.130426 | -3.779744 |
| C | 1.378110  | 1.020549  | -3.216068 |
| C | 0.646709  | 2.201194  | -2.827924 |
| C | -0.813995 | 2.200128  | -2.956336 |
| C | -1.611769 | 3.292928  | -2.549712 |
| C | -3.004256 | 3.288008  | -2.658081 |
| H | -3.597358 | 4.144763  | -2.326022 |
| H | -1.137569 | 4.162030  | -2.107888 |
| H | -3.445346 | -2.064435 | -4.880339 |
| C | 1.519648  | -1.209683 | -4.214246 |
| C | 2.808537  | 0.982543  | -3.076060 |
| C | 1.411040  | 3.305669  | -2.357092 |
| C | 3.558036  | -0.158585 | -3.454666 |
| C | 2.905188  | -1.237299 | -4.041309 |
| H | 3.494727  | -2.102278 | -4.356573 |
| C | 3.501685  | 2.098730  | -2.541120 |
| C | 2.806268  | 3.244647  | -2.205047 |
| H | 3.352501  | 4.099813  | -1.801240 |
| C | 5.020431  | -0.236942 | -3.231651 |
| C | 4.965868  | 2.075499  | -2.316222 |
| H | 1.045030  | -2.051524 | -4.707027 |
| O | -5.708730 | -1.111182 | -4.558564 |
| O | -5.817286 | 3.124242  | -2.758103 |
| O | 5.678724  | -1.251055 | -3.490097 |
| O | 5.571219  | 3.030278  | -1.809865 |
| N | -5.770819 | 1.000987  | -3.645022 |
| N | 5.644386  | 0.909280  | -2.698639 |
| C | -5.189746 | -2.685238 | 1.883633  |
| C | -3.733613 | -2.677088 | 2.146857  |
| C | -3.097206 | -1.576404 | 2.773175  |
| C | -3.893624 | -0.483177 | 3.196449  |
| C | -5.354804 | -0.440605 | 2.954227  |
| C | -2.968183 | -3.761675 | 1.734449  |
| C | -1.671616 | -1.542812 | 2.956990  |
| C | -0.899492 | -2.688086 | 2.537305  |
| C | -1.586938 | -3.769981 | 1.941887  |
| C | 0.556935  | -2.680139 | 2.723317  |
| C | 1.182923  | -1.477619 | 3.215133  |
| C | 0.410590  | -0.320508 | 3.598850  |
| C | -1.051887 | -0.382962 | 3.542319  |
| C | -1.916680 | 0.646428  | 4.018062  |
| C | -3.306375 | 0.600590  | 3.825885  |
| H | -3.945472 | 1.425448  | 4.148622  |
| H | -3.471350 | -4.606045 | 1.254774  |
| H | -1.030524 | -4.645879 | 1.627037  |

|   |           |           |           |
|---|-----------|-----------|-----------|
| C | 1.415529  | -3.771975 | 2.413387  |
| C | 2.616252  | -1.397461 | 3.289274  |
| C | 1.107498  | 0.847838  | 3.979316  |
| C | 3.413429  | -2.518791 | 2.946818  |
| C | 2.808627  | -3.699452 | 2.552234  |
| H | 3.435554  | -4.561790 | 2.313057  |
| C | 3.266536  | -0.200099 | 3.684122  |
| C | 2.501873  | 0.908155  | 4.027476  |
| H | 3.008913  | 1.833285  | 4.312407  |
| C | 4.893719  | -2.459176 | 2.953698  |
| C | 4.739860  | -0.078636 | 3.667384  |
| H | 0.554515  | 1.750109  | 4.213731  |
| O | -5.757212 | -3.621924 | 1.309154  |
| O | -6.054473 | 0.523114  | 3.289571  |
| O | 5.598378  | -3.424096 | 2.634518  |
| O | 5.322719  | 0.983364  | 3.927710  |
| N | -5.914144 | -1.553835 | 2.305346  |
| N | 5.469565  | -1.227214 | 3.310529  |
| C | -7.229474 | 0.866907  | -3.417066 |
| H | -7.655879 | 1.876132  | -3.494086 |
| H | -7.619279 | 0.222356  | -4.216381 |
| C | 7.090525  | 0.821215  | -2.378851 |
| H | 7.503924  | 1.830254  | -2.515284 |
| H | 7.526563  | 0.126871  | -3.109996 |
| C | 6.933169  | -1.079195 | 3.121813  |
| H | 7.372910  | -2.068604 | 3.307026  |
| H | 7.279193  | -0.357779 | 3.874545  |
| C | -7.343746 | -1.478997 | 1.924453  |
| H | -7.732369 | -2.506160 | 1.954887  |
| H | -7.836612 | -0.860355 | 2.687064  |
| C | -7.447094 | 0.261708  | -2.044370 |
| C | -7.475880 | -1.135186 | -1.879743 |
| C | -7.478506 | 1.085988  | -0.903591 |
| C | -7.490710 | -1.698008 | -0.598329 |
| H | -7.443153 | -1.778528 | -2.764071 |
| C | -7.495634 | 0.523183  | 0.377370  |
| H | -7.451869 | 2.172596  | -1.028847 |
| C | -7.480152 | -0.874787 | 0.541860  |
| H | -7.470723 | -2.784647 | -0.472588 |
| H | -7.487514 | 1.165126  | 1.263574  |
| C | 7.280665  | 0.330072  | -0.958080 |
| C | 7.278580  | 1.243041  | 0.112683  |
| C | 7.326681  | -1.048938 | -0.678918 |
| C | 7.240747  | 0.785973  | 1.434590  |
| H | 7.249220  | 2.315136  | -0.100680 |
| C | 7.292672  | -1.506505 | 0.644683  |
| H | 7.330710  | -1.761977 | -1.509043 |
| C | 7.208957  | -0.592780 | 1.712813  |
| H | 7.179987  | 1.498528  | 2.262079  |
| H | 7.272447  | -2.579789 | 0.856694  |
| O | -1.360467 | 1.739070  | 4.640122  |
| O | 0.875042  | -4.983354 | 2.023923  |

|   |           |           |           |
|---|-----------|-----------|-----------|
| O | 0.778394  | 4.463866  | -1.969242 |
| O | -0.908027 | -2.431899 | -4.764866 |
| C | -2.166436 | 2.656108  | 5.317273  |
| C | -2.149808 | 3.979631  | 4.864390  |
| C | -2.882458 | 2.277047  | 6.460652  |
| C | -2.877144 | 4.945731  | 5.573410  |
| H | -1.561906 | 4.228909  | 3.976193  |
| C | -3.610337 | 3.252762  | 7.153224  |
| H | -2.865307 | 1.235279  | 6.792818  |
| C | -3.610476 | 4.585204  | 6.712740  |
| H | -2.870938 | 5.984629  | 5.229328  |
| H | -4.176246 | 2.968749  | 8.045664  |
| H | -4.180388 | 5.341832  | 7.259975  |
| C | 1.439934  | -5.710488 | 0.979272  |
| C | 1.147982  | -7.082141 | 0.973561  |
| C | 2.181718  | -5.123751 | -0.057335 |
| C | 1.616340  | -7.876432 | -0.080387 |
| H | 0.565923  | -7.505089 | 1.797026  |
| C | 2.647701  | -5.934255 | -1.099806 |
| H | 2.392627  | -4.052514 | -0.046611 |
| C | 2.372379  | -7.308969 | -1.117597 |
| H | 1.395372  | -8.948369 | -0.082637 |
| H | 3.224739  | -5.476262 | -1.909149 |
| H | 2.745592  | -7.935309 | -1.933317 |
| C | 1.416305  | 5.692077  | -2.144491 |
| C | 2.033483  | 6.030123  | -3.357834 |
| C | 1.326125  | 6.606123  | -1.088946 |
| C | 2.583004  | 7.310067  | -3.501278 |
| H | 2.077433  | 5.300220  | -4.170949 |
| C | 1.873210  | 7.885368  | -1.252929 |
| H | 0.841602  | 6.293232  | -0.160879 |
| C | 2.505110  | 8.240026  | -2.453645 |
| H | 3.068138  | 7.582431  | -4.443647 |
| H | 1.809843  | 8.606073  | -0.431656 |
| H | 2.935358  | 9.238556  | -2.574089 |
| C | -0.988997 | -3.540271 | -3.918652 |
| C | -0.085911 | -4.577889 | -4.200332 |
| C | -1.874395 | -3.637387 | -2.836055 |
| C | -0.045678 | -5.698363 | -3.363352 |
| H | 0.581078  | -4.486349 | -5.062712 |
| C | -1.820603 | -4.768387 | -2.008285 |
| H | -2.575490 | -2.830267 | -2.621063 |
| C | -0.901924 | -5.795931 | -2.255693 |
| H | 0.674435  | -6.496032 | -3.567490 |
| H | -2.502679 | -4.827773 | -1.154013 |
| H | -0.840251 | -6.661302 | -1.589945 |
| C | 3.047010  | -1.361931 | -0.365793 |
| C | 3.859269  | -0.251561 | 0.118927  |
| C | 3.294183  | 0.973941  | 0.572209  |
| C | 1.622113  | -1.322135 | -0.413500 |
| C | 0.302303  | -2.113560 | -0.825264 |
| C | 0.042277  | 4.401869  | 1.709355  |

|   |           |           |           |
|---|-----------|-----------|-----------|
| C | -0.811726 | 3.353764  | 1.254742  |
| C | -2.324333 | 2.912303  | 0.991255  |
| C | 1.499531  | 4.281009  | 1.747136  |
| C | 2.189870  | 3.106967  | 1.329700  |
| C | 1.296200  | 2.131740  | 0.914520  |
| C | -0.073950 | 2.243392  | 0.881171  |
| C | -0.854730 | 1.172660  | 0.419609  |
| C | -2.215243 | 1.431070  | 0.417203  |
| C | -2.950349 | 0.319065  | -0.081361 |
| C | -2.306519 | -0.913964 | -0.523163 |
| C | -0.893649 | -1.107385 | -0.500580 |
| C | -0.250560 | 0.011782  | 0.002146  |
| C | 1.147076  | -0.106662 | 0.049909  |
| C | 1.911375  | 0.943926  | 0.496303  |
| C | 3.620715  | 2.424915  | 1.139089  |
| H | 2.039859  | 5.160958  | 2.114649  |
| H | -0.362891 | 5.363727  | 2.047994  |
| H | 4.939122  | -0.413825 | 0.107798  |
| H | 3.614248  | -2.233765 | -0.712719 |
| H | -2.990597 | -1.699692 | -0.858828 |
| H | -4.044450 | 0.339587  | -0.153735 |
| H | -2.921335 | 2.939709  | 1.920967  |
| H | -2.826959 | 3.584727  | 0.274329  |
| H | 4.256145  | 2.990994  | 0.434511  |
| H | 4.181586  | 2.363556  | 2.088865  |
| H | 0.323770  | -2.392007 | -1.890548 |
| H | 0.186004  | -3.061111 | -0.273283 |

Number of imaginary frequencies = 1 (-84.4 cm<sup>-1</sup>)  
Computed total Gibbs free energy = -5319.695 a.u.
